# Supplementary material for: An exploration of the solvent- and acid-catalyzed mutarotation mechanisms of lactose in aqueous solution
Source: Royal Society of Chemistry journal article supplement (doi:10.1039/d0nj03660a), 2020-01-01
Supplement: d0nj03660a1.pdf [file d0nj03660a1.pdf]

## Supporting Information

# An Exploration of the Solvent- and Acid-catalyzed Mutarotation Mechanisms of Lactose in Aqueous Solution

Zeqin Chen<sup>1,2\*</sup> Tunyan Wu<sup>3</sup> Xue Yang<sup>1</sup> Fen Yue<sup>1</sup> Fengping Fu<sup>2</sup>

<sup>1</sup>College of Materials and Chemistry & Chemical Engineering,  
Chengdu University of Technology, Chengdu 610059,  
People's Republic of China

<sup>2</sup>College of Chemistry and Chemical Engineering,  
China West Normal University, Nanchong 637002,  
People's Republic of China

<sup>3</sup>Chengdu Jinjiang Research Institute of Education Science,  
Chengdu 610064, People's Republic of China

---

\* Corresponding authors. *E-mail* address: chenzeqin@sina.com

Phone: +86-28-84078956



## Contents

|                                                                                                                                                                                                                                                               |   |
|---------------------------------------------------------------------------------------------------------------------------------------------------------------------------------------------------------------------------------------------------------------|---|
| <b>Table S1</b> Changes of Gibbs free energies ( $\Delta G$ -s) and electronic energies ( $\Delta E$ -s) for the solvent-catalyzed mutarotation processes of $\alpha$ -lactose in aqueous solution.....                                                       | 1 |
| <b>Table S2</b> Changes of Gibbs free energies ( $\Delta G$ -s) and electronic energies ( $\Delta E$ -s) for the HAc-catalyzed mutarotation processes of $\alpha$ -lactose in aqueous solution.....                                                           | 2 |
| <b>Table S3</b> Changes of Gibbs free energies ( $\Delta G$ -s) and electronic energies ( $\Delta E$ -s) for the TFA-catalyzed mutarotation processes of $\alpha$ -lactose in aqueous solution.....                                                           | 3 |
| <b>Fig. S1</b> B3LYP-D3/6-311++G(d,p) optimized structures ( $\text{\AA}$ ) of all the stationary points in the solvent-catalyzed ring-opening step of $\alpha$ -lactose ( $\nu$ represents for the single imaginary frequency of the transition state).....  | 4 |
| <b>Fig. S2</b> B3LYP-D3/6-311++G(d,p) optimized structures( $\text{\AA}$ ) of all the stationary points in the solvent-catalyzed ring-closing step of $\alpha$ -lactose ( $\nu$ represents for the single imaginary frequency of the transition state).....   | 5 |
| <b>Fig. S3</b> B3LYP-D3/6-311++G(d,p) optimized structures ( $\text{\AA}$ ) of all the stationary points in the HAc-catalyzed mutarotation processes of $\alpha$ -lactose ( $\nu$ represents for the single imaginary frequency of the transition state)..... | 6 |
| <b>Fig. S4</b> B3LYP-D3/6-311++G(d,p) optimized structures( $\text{\AA}$ ) of all the stationary points in the TFA-catalyzed mutarotation processes of $\alpha$ -lactose ( $\nu$ represents for the single imaginary frequency of the transition state).....  | 7 |
| <b>Cartesian coordinates of all stationary points</b> .....                                                                                                                                                                                                   | 8 |

**Table S1** Changes of Gibbs free energies ( $\Delta G$ -s) and electronic energies ( $\Delta E$ -s) for the solvent-catalyzed mutarotation processes of  $\alpha$ -lactose in aqueous solution.

|                                                   | B3LYP-D3   |            | B3PW91-D3  |            | PBE1PBE-D3 |            |
|---------------------------------------------------|------------|------------|------------|------------|------------|------------|
|                                                   | $\Delta G$ | $\Delta E$ | $\Delta G$ | $\Delta E$ | $\Delta G$ | $\Delta E$ |
| Direct reaction mechanism                         |            |            |            |            |            |            |
| RC $\rightarrow$ TS1                              | 42.5       | 43.0       | 42.5       | 43.0       | 43.7       | 44.2       |
| RC $\rightarrow$ IM1                              | 7.3        | 8.5        | 10.4       | 11.6       | 12.1       | 13.3       |
| IM1 $\rightarrow$ TS <sub>R</sub>                 | 2.6        | 2.3        | 2.3        | 2.0        | 2.0        | 1.7        |
| IM1 $\rightarrow$ IM2                             | -0.4       | -0.2       | -0.4       | -0.2       | -0.6       | -0.3       |
| IM2 $\rightarrow$ TS2                             | 34.3       | 33.3       | 31.1       | 30.1       | 30.6       | 29.5       |
| IM2 $\rightarrow$ PC                              | -3.9       | -5.5       | -7.0       | -8.7       | -8.3       | -10.0      |
| One-water-mediated reaction mechanism             |            |            |            |            |            |            |
| RC <sub>w</sub> $\rightarrow$ TS1 <sub>w</sub>    | 25.4       | 24.5       | 24.4       | 23.5       | 25.8       | 25.0       |
| RC <sub>w</sub> $\rightarrow$ IM1 <sub>w</sub>    | 6.6        | 7.8        | 9.6        | 10.9       | 11.2       | 12.5       |
| IM1 <sub>w</sub> $\rightarrow$ IM2 <sub>w</sub>   | 0.5        | 0.6        | 0.6        | 0.6        | 0.5        | 0.6        |
| IM2 <sub>w</sub> $\rightarrow$ TS2 <sub>w</sub>   | 18.1       | 15.7       | 14.2       | 11.8       | 13.9       | 11.5       |
| IM2 <sub>w</sub> $\rightarrow$ PC <sub>w</sub>    | -7.3       | -7.4       | -10.6      | -10.7      | -12.2      | -12.3      |
| Two-water-mediated reaction mechanism             |            |            |            |            |            |            |
| RC <sub>2w</sub> $\rightarrow$ TS1 <sub>2w</sub>  | 22.1       | 20.4       | 20.9       | 19.1       | 22.1       | 20.4       |
| RC <sub>2w</sub> $\rightarrow$ IM1 <sub>2w</sub>  | 5.9        | 7.0        | 9.6        | 10.1       | 10.4       | 11.5       |
| IM1 <sub>2w</sub> $\rightarrow$ IM2 <sub>2w</sub> | 0.3        | 0.1        | 0.4        | 0.2        | 0.3        | 0.1        |
| IM2 <sub>2w</sub> $\rightarrow$ TS2 <sub>2w</sub> | 18.8       | 13.4       | 14.7       | 9.2        | 14.4       | 8.9        |
| IM2 <sub>2w</sub> $\rightarrow$ PC <sub>2w</sub>  | -5.6       | -6.4       | -8.6       | -9.4       | -10.1      | -10.9      |
| Three-water-mediated reaction mechanism           |            |            |            |            |            |            |

|                                 |      |      |      |      |      |       |
|---------------------------------|------|------|------|------|------|-------|
| $RC_{3w} \rightarrow TS1_{3w}$  | 21.8 | 21.1 | 20.2 | 19.5 | 21.2 | 20.5  |
| $RC_{3w} \rightarrow IM1_{3w}$  | 6.8  | 8.6  | 9.7  | 11.5 | 11.3 | 13.1  |
| $IM1_{3w} \rightarrow IM2_{3w}$ | -0.4 | -0.1 | -0.3 | 0.0  | -0.4 | -0.1  |
| $IM2_{3w} \rightarrow TS2_{3w}$ | 18.5 | 14.9 | 14.3 | 10.7 | 13.7 | 10.1  |
| $IM2_{3w} \rightarrow PC_{3w}$  | -4.2 | -6.4 | -7.0 | -9.2 | -8.6 | -10.8 |

**Table S2** Changes of Gibbs free energies ( $\Delta G$ -s) and electronic energies ( $\Delta E$ -s) for the HAC-catalyzed mutarotation processes of  $\alpha$ -lactose in aqueous solution.

|                                       | B3LYP-D3   |            | B3PW91-D3  |            | PBE1PBE-D3 |            |
|---------------------------------------|------------|------------|------------|------------|------------|------------|
|                                       | $\Delta G$ | $\Delta E$ | $\Delta G$ | $\Delta E$ | $\Delta G$ | $\Delta E$ |
| Direct reaction mechanism             |            |            |            |            |            |            |
| $RC_{HAc} \rightarrow TS1_{HAc}$      | 13.5       | 12.8       | 13.7       | 13.0       | 15.0       | 14.3       |
| $RC_{HAc} \rightarrow IM1_{HAc}$      | 6.9        | 7.7        | 9.9        | 10.7       | 11.4       | 12.2       |
| $IM1_{HA^c} \rightarrow IM2_{HAc}$    | 2.1        | 2.2        | 2.3        | 2.4        | 2.1        | 2.2        |
| $IM2_{HA^c} \rightarrow TS2_{HAc}$    | 5.0        | 3.3        | 2.2        | 0.5        | 2.2        | 0.5        |
| $IM2_{HAc} \rightarrow PC_{HAc}$      | -8.2       | -9.1       | -11.3      | -12.1      | -12.7      | -13.6      |
| One-water-mediated reaction mechanism |            |            |            |            |            |            |

|                                       |      |      |      |       |       |       |
|---------------------------------------|------|------|------|-------|-------|-------|
| $RC_{HAC+W} \rightarrow TS1_{HAC+W}$  | 17.2 | 16.9 | 17.4 | 17.0  | 19.2  | 18.9  |
| $RC_{HAC+W} \rightarrow IM1_{HAC+W}$  | 6.9  | 7.9  | 9.6  | 10.7  | 11.1  | 12.2  |
| $IM1_{HAC+W} \rightarrow IM2_{HAC+W}$ | 0.0  | 0.0  | 0.1  | 0.1   | 0.0   | 0.0   |
| $IM2_{HAC+W} \rightarrow TS2_{HAC+W}$ | 9.2  | 9.2  | 6.9  | 6.9   | 7.3   | 7.4   |
| $IM2_{HAC+W} \rightarrow PC_{HAC+W}$  | -5.7 | -7.7 | -8.5 | -10.5 | -10.0 | -11.9 |

---

**Table S3** Changes of Gibbs free energies ( $\Delta G$ -s) and electronic energies ( $\Delta E$ -s) for the TFA-catalyzed mutarotation processes of  $\alpha$ -lactose in aqueous solution.

|                                           | B3LYP-D3   |            | B3PW91-D3  |            | PBE1PBE-D3 |            |
|-------------------------------------------|------------|------------|------------|------------|------------|------------|
|                                           | $\Delta G$ | $\Delta E$ | $\Delta G$ | $\Delta E$ | $\Delta G$ | $\Delta E$ |
| Direct reaction mechanism                 |            |            |            |            |            |            |
| $RC_{TFA} \rightarrow TS1_{TFA}$          | 8.7        | 8.7        | 10.3       | 10.2       | 11.9       | 11.9       |
| $RC_{TFA} \rightarrow IM1_{TFA}$          | 6.8        | 7.3        | 9.7        | 10.3       | 11.2       | 11.7       |
| $IM1_{TFA} \rightarrow IM2_{TFA}$         | -0.4       | 0.1        | -0.3       | 0.2        | -0.4       | 0.1        |
| $IM2_{TFA} \rightarrow TS2_{TFA}$         | 2.5        | 1.3        | 1.2        | 0.0        | 1.5        | 0.2        |
| $IM2_{TFA} \rightarrow PC_{TFA}$          | -5.7       | -6.3       | -8.4       | -9.1       | -9.9       | -10.5      |
| One-water-mediated reaction mechanism     |            |            |            |            |            |            |
| $RC_{TFA+W} \rightarrow TS1_{TFA+W}$      | 10.8       | 9.9        | 12.0       | 11.1       | 13.8       | 12.9       |
| $RC_{TFA+W} \rightarrow IM1_{TFA+W}$      | 6.6        | 6.3        | 9.6        | 9.3        | 10.7       | 10.4       |
| $IM1_{TFA+W} \rightarrow IM2_{TFA+}$<br>w | 0.1        | 0.3        | -0.1       | 0.0        | 0.1        | 0.2        |
| $IM2_{TFA+W} \rightarrow TS2_{TFA+W}$     | 2.8        | 3.0        | 1.5        | 1.6        | 1.9        | 2.1        |
| $IM2_{TFA+W} \rightarrow PC_{TFA+W}$      | -6.0       | -5.7       | -8.6       | -8.3       | -10.0      | -9.7       |

(a) the direct ring-opening mechanism

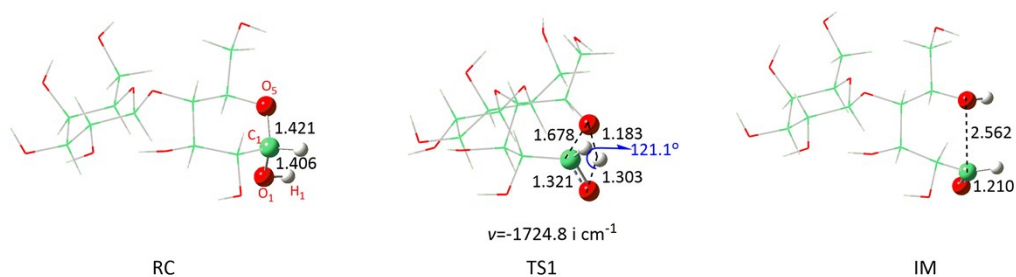

(b) one-water-mediated ring-opening mechanism

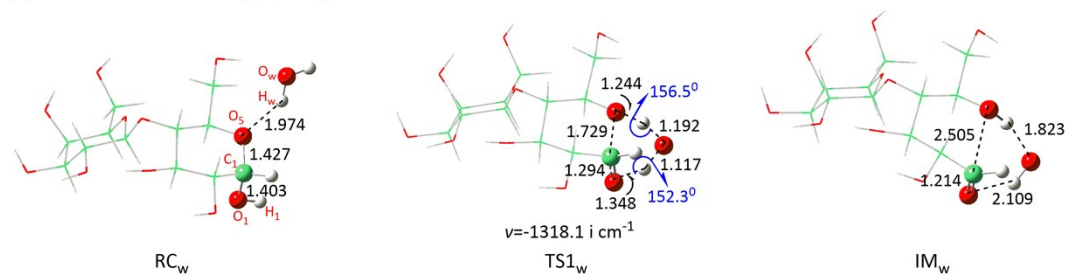

(c) two-water-mediated ring-opening mechanism

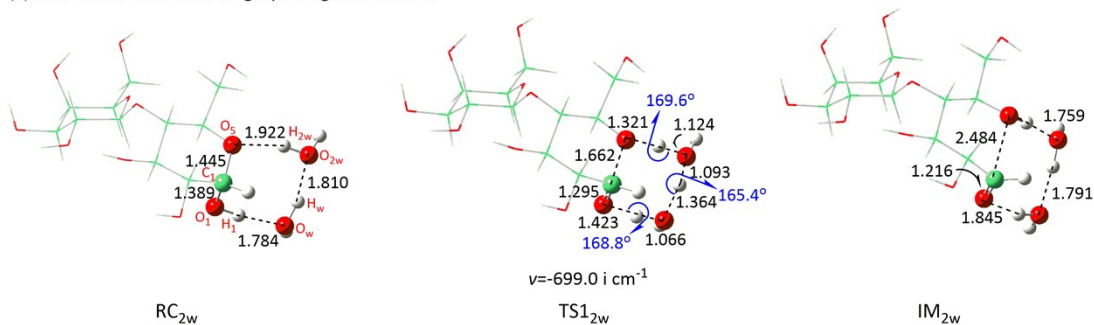

(d) three-water-mediated ring-opening mechanism

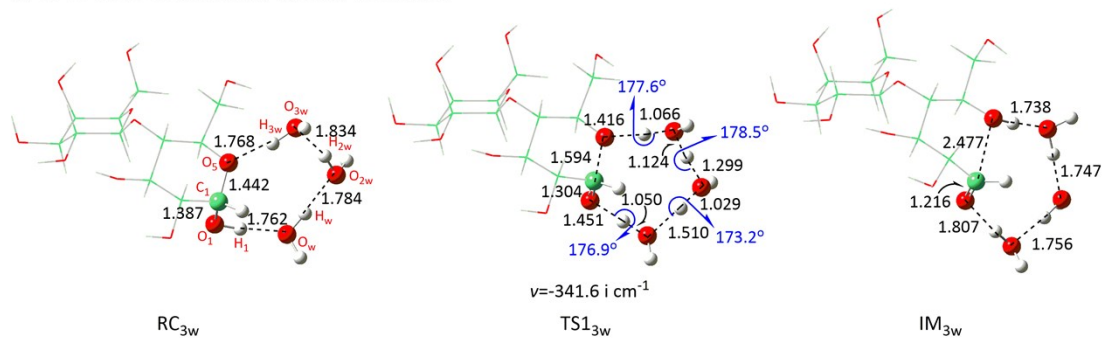

**Fig. S1** B3LYP-D3/6-311++G(d,p) optimized structures (Å) of all the stationary points in the solvent-catalyzed ring-opening step of  $\alpha$ -lactose ( $\nu$  represents for the single imaginary frequency of the transition state).



(a) the direct ring-closing mechanism

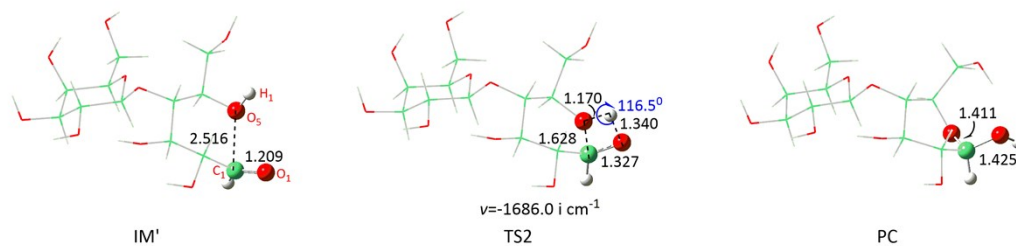

(b) one-water-mediated ring-closing mechanism

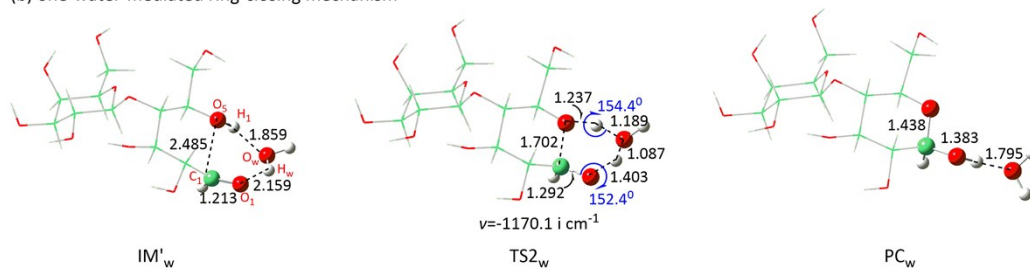

(c) two-water-mediated ring-closing mechanism

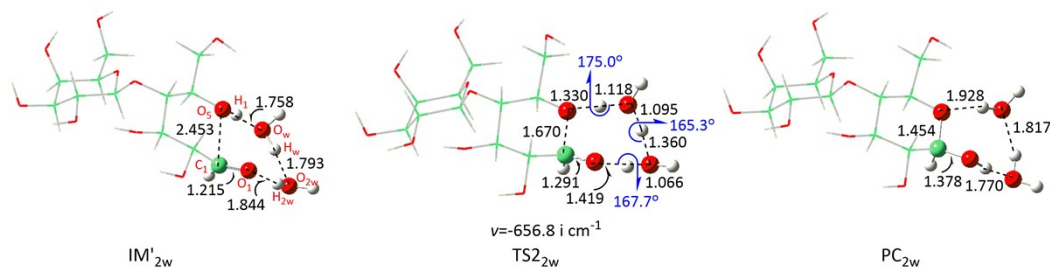

(d) three-water-mediated ring-closing mechanism

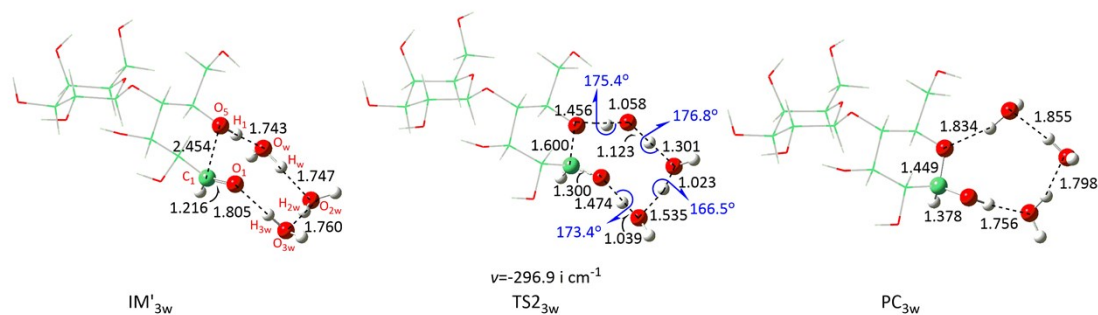

**Fig. S2** B3LYP-D3/6-311++G(d,p) optimized structures (Å) of all the stationary points in the solvent-catalyzed ring-closing step of  $\alpha$ -lactose ( $\nu$  represents for the single imaginary frequency of the transition state).

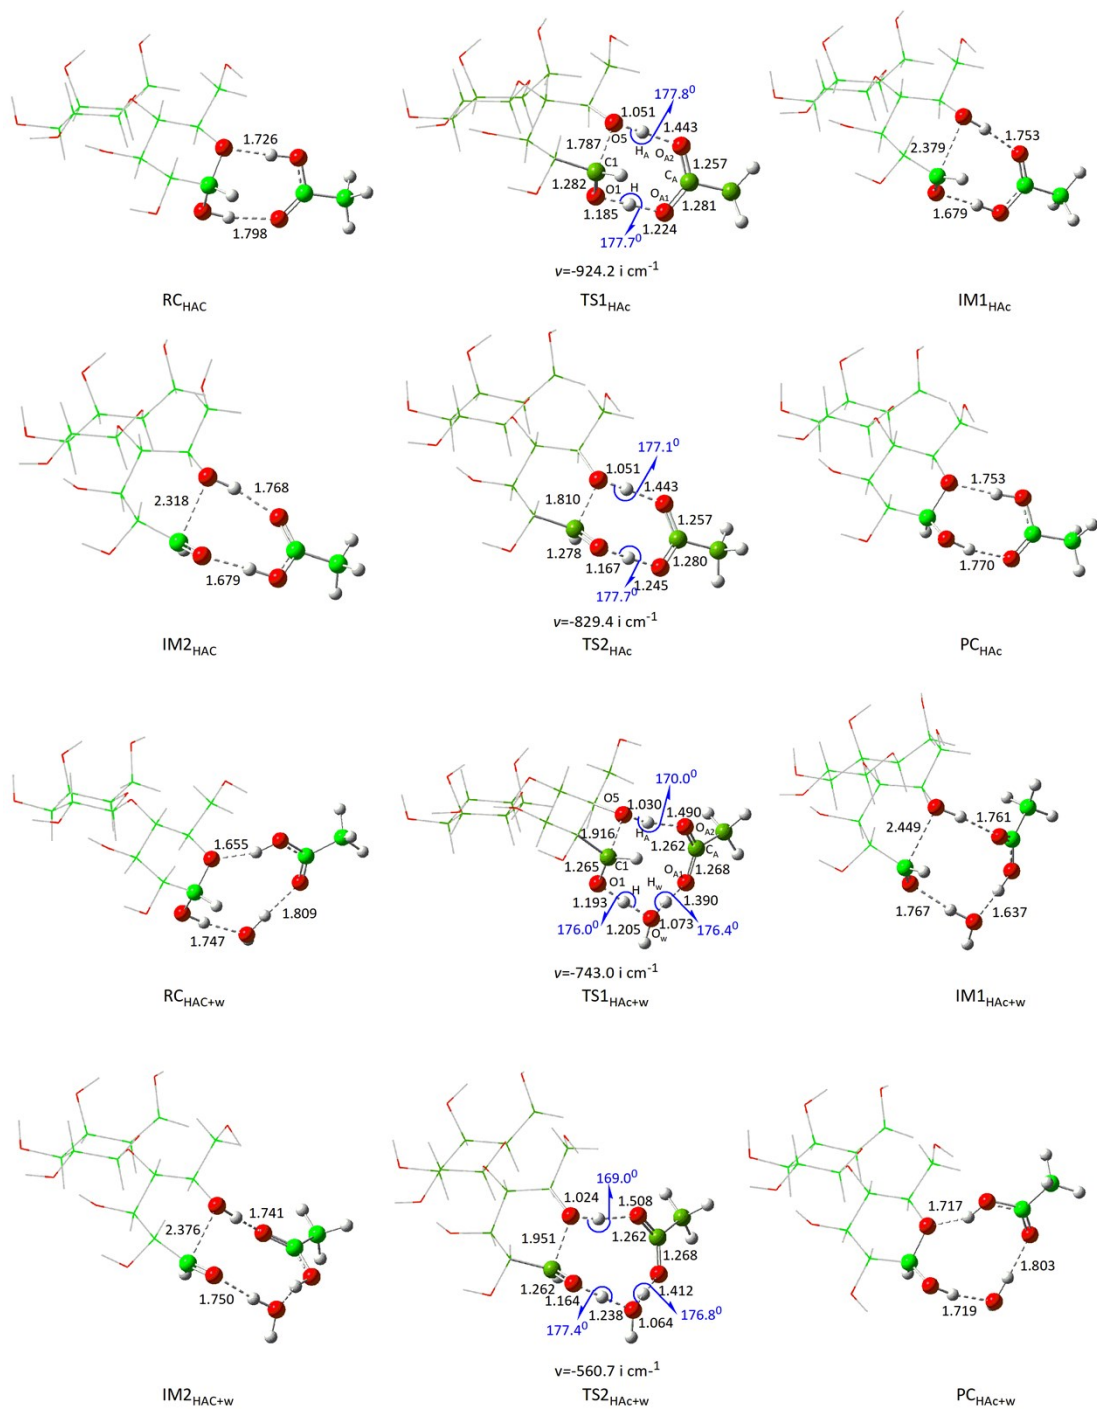

**Fig. S3** B3LYP-D3/6-311++G(d,p) optimized structures (Å) of all the stationary points in the HAC-catalyzed mutarotation processes of  $\alpha$ -lactose ( $\nu$  represents for the single imaginary frequency of the transition state).



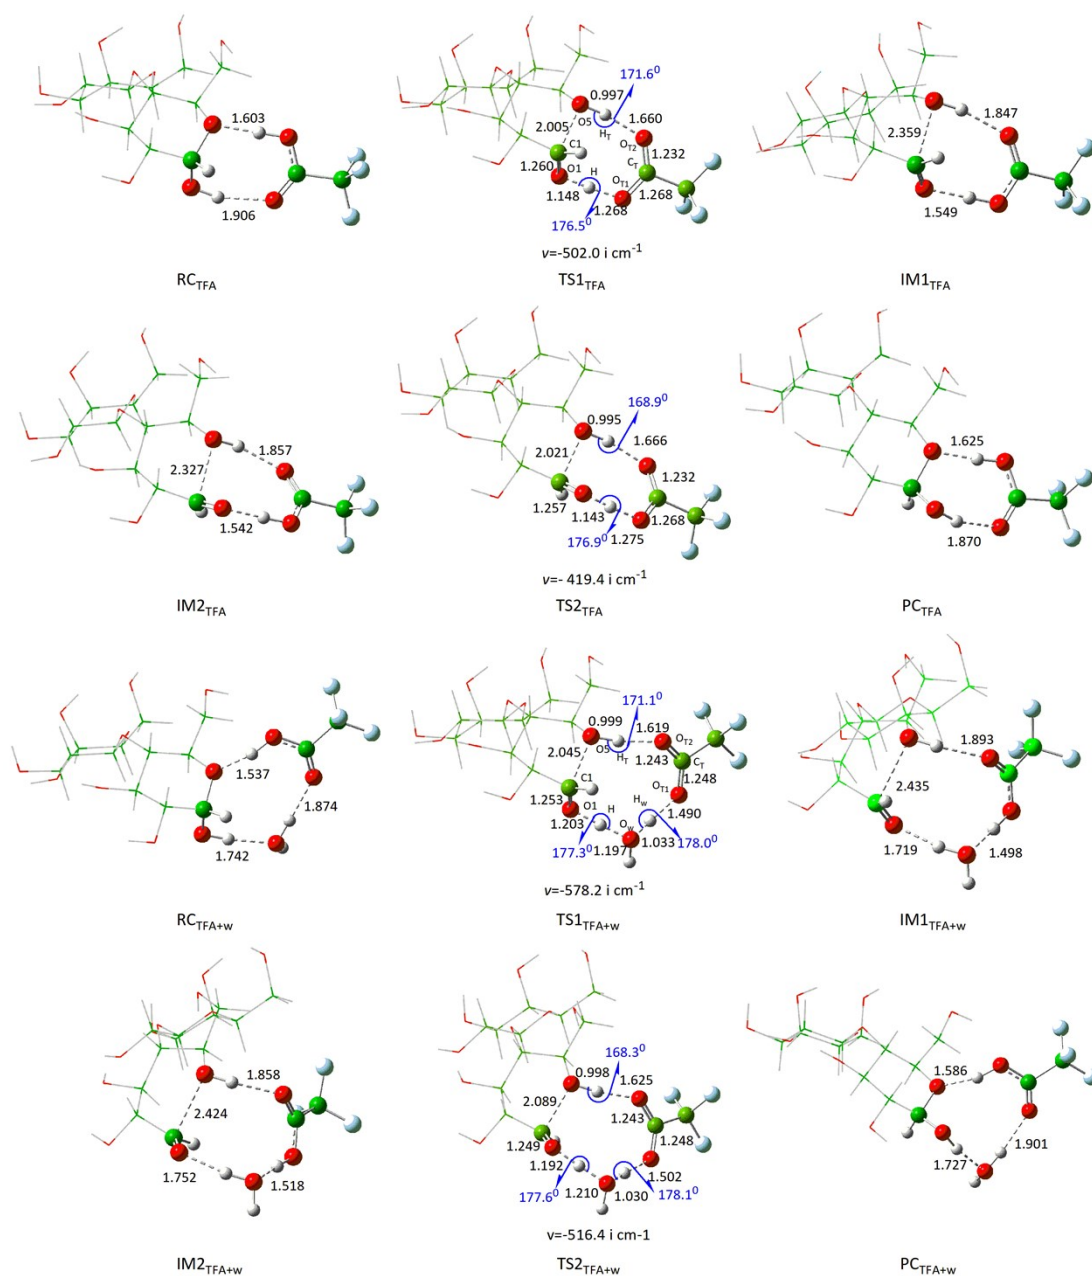

**Fig. S4** B3LYP-D3/6-311++G(d,p) optimized structures(Å) of all the stationary points in the TFA-catalyzed mutarotation processes of  $\alpha$ -lactose ( $\nu$  represents for the single imaginary frequency of the transition state).

## Cartesian coordinates of all stationary points

### 1. Solvent-catalyzed Mechanism

#### RC

|   |          |          |          |   |          |          |          |
|---|----------|----------|----------|---|----------|----------|----------|
| O | -0.13323 | -0.00916 | -1.14459 | O | 1.57245  | 0.91654  | 0.03535  |
| O | 1.57245  | 0.91654  | 0.03535  | O | -3.2628  | 1.44085  | 0.26397  |
| O | -3.2628  | 1.44085  | 0.26397  | C | 3.24673  | 2.16691  | 1.17051  |
| C | 2.81988  | -1.63901 | 0.45903  | H | 2.48968  | 2.89742  | 1.4672   |
| C | 1.67744  | -1.43125 | -0.54132 | H | 4.01298  | 2.1271   | 1.94597  |
| C | 0.78715  | -0.2596  | -0.12273 | O | 3.9082   | 2.59378  | -0.0311  |
| C | 2.59914  | 0.79336  | 1.02956  | H | 3.23308  | 2.8338   | -0.67762 |
| C | 3.58842  | -0.33424 | 0.68351  | O | 4.34572  | -0.09615 | -0.50477 |
| H | 2.08927  | -1.20075 | -1.52965 | H | 4.50179  | 0.86058  | -0.57426 |
| H | 2.39834  | -1.97588 | 1.41029  | O | 3.67413  | -2.6936  | 0.01849  |
| H | 2.14495  | 0.5458   | 2.00059  | H | 4.24124  | -2.32803 | -0.67518 |
| H | 4.26678  | -0.46127 | 1.53728  | O | 0.85043  | -2.59724 | -0.61108 |
| H | 0.28792  | -0.4909  | 0.82727  | H | 1.42216  | -3.35947 | -0.77021 |
| C | -2.1119  | -1.13861 | -0.19589 | O | -1.96477 | -2.27234 | -1.04454 |
| C | -3.60561 | -0.93598 | 0.04815  | H | -1.02431 | -2.52504 | -1.03016 |
| C | -3.83979 | 0.31089  | 0.90579  | O | -4.19633 | -2.06591 | 0.67487  |
| C | -1.84055 | 1.37168  | 0.02606  | H | -3.92266 | -2.83994 | 0.16569  |
| C | -1.52963 | 0.13096  | -0.82911 | O | -3.29925 | 0.10025  | 2.18713  |
| H | -4.90599 | 0.54047  | 0.9639   | H | -3.61624 | 0.79843  | 2.77265  |
| H | -4.09182 | -0.74987 | -0.9182  | C | -1.4704  | 2.68805  | -0.64589 |
| H | -1.63674 | -1.3407  | 0.7703   | H | -1.67914 | 3.50622  | 0.05271  |
| H | -1.31454 | 1.31592  | 0.98563  | H | -0.40506 | 2.68862  | -0.87347 |
| H | -1.99177 | 0.2641   | -1.8091  |   |          |          |          |

|                       |          |          |          |   |          |          |          |
|-----------------------|----------|----------|----------|---|----------|----------|----------|
| O                     | -2.15952 | 2.89292  | -1.87867 | O | 1.69764  | -0.97957 | -0.10962 |
| H                     | -3.10547 | 2.87485  | -1.68825 | O | -3.16494 | -0.81564 | -0.54073 |
| <b>RC<sub>w</sub></b> |          |          |          | C | 3.24831  | -2.35324 | -1.27679 |
| C                     | 3.27076  | 1.41771  | -0.30004 | H | 2.41886  | -2.95826 | -1.65175 |
| C                     | 2.07355  | 1.28715  | 0.64721  | H | 4.04648  | -2.36003 | -2.02028 |
| C                     | 1.06007  | 0.27313  | 0.11205  | O | 3.79778  | -2.94268 | -0.08739 |
| C                     | 2.7727   | -0.92055 | -1.05799 | H | 3.07012  | -3.13585 | 0.51645  |
| C                     | 3.87903  | 0.04518  | -0.59867 | O | 4.55434  | -0.37045 | 0.59051  |
| H                     | 2.41418  | 0.93417  | 1.62651  | H | 4.5839   | -1.34192 | 0.59509  |
| H                     | 2.93217  | 1.87259  | -1.23503 | O | 4.23227  | 2.3214   | 0.24363  |
| H                     | 2.39416  | -0.55207 | -2.0231  | H | 4.72342  | 1.83837  | 0.92331  |
| H                     | 4.60089  | 0.14583  | -1.41963 | O | 1.39963  | 2.54248  | 0.78236  |
| H                     | 0.63426  | 0.63363  | -0.83338 | H | 2.0569   | 3.20872  | 1.02192  |
| C                     | -1.69864 | 1.53168  | 0.18726  | O | -1.43768 | 2.55507  | 1.14197  |
| C                     | -3.1939  | 1.55724  | -0.11827 | H | -0.4728  | 2.68486  | 1.16964  |
| C                     | -3.55059 | 0.43969  | -1.10127 | O | -3.60327 | 2.80838  | -0.65181 |
| C                     | -1.75072 | -0.96822 | -0.25537 | H | -3.24731 | 3.48934  | -0.06622 |
| C                     | -1.3154  | 0.14378  | 0.7152   | O | -2.9173  | 0.6823   | -2.33042 |
| H                     | -4.63328 | 0.3677   | -1.22396 | H | -3.32187 | 0.12381  | -3.00489 |
| H                     | -3.74248 | 1.35097  | 0.80973  | C | -1.53725 | -2.37614 | 0.29728  |
| H                     | -1.16161 | 1.75278  | -0.74174 | H | -1.93817 | -3.09358 | -0.42841 |
| H                     | -1.19869 | -0.89192 | -1.1984  | H | -0.46293 | -2.54276 | 0.3799   |
| H                     | -1.82963 | -0.01508 | 1.6645   | O | -2.09555 | -2.58993 | 1.58794  |
| O                     | 0.07352  | 0.06884  | 1.08133  | H | -3.06304 | -2.66492 | 1.49717  |

|                        |          |          |          |   |          |          |          |
|------------------------|----------|----------|----------|---|----------|----------|----------|
| O                      | -4.84811 | -2.52971 | 0.96019  | O | -0.55998 | 0.46218  | -1.28013 |
| H                      | -4.55193 | -2.01477 | 0.19072  | O | -1.86164 | -1.01658 | -0.15196 |
| H                      | -5.30578 | -3.29991 | 0.60447  | O | 2.95929  | -0.49952 | -0.5234  |
| <b>RC<sub>2w</sub></b> |          |          |          | C | -3.08192 | -2.79386 | 0.85085  |
| C                      | -3.49486 | 1.07699  | 0.94604  | H | -2.1647  | -3.38591 | 0.90402  |
| C                      | -2.49786 | 1.31932  | -0.19178 | H | -3.72273 | -3.07065 | 1.68904  |
| C                      | -1.34839 | 0.31062  | -0.13541 | O | -3.81435 | -3.11503 | -0.34276 |
| C                      | -2.73628 | -1.31161 | 0.94676  | H | -3.20423 | -3.07668 | -1.08958 |
| C                      | -3.96105 | -0.38062 | 0.95832  | O | -4.82575 | -0.54474 | -0.16772 |
| H                      | -3.00159 | 1.20011  | -1.15687 | H | -4.79941 | -1.47939 | -0.43289 |
| H                      | -3.00627 | 1.30531  | 1.89729  | O | -4.5892  | 1.98753  | 0.84444  |
| H                      | -2.20099 | -1.16178 | 1.89615  | H | -5.17479 | 1.65181  | 0.15103  |
| H                      | -4.51854 | -0.5691  | 1.88506  | O | -1.92659 | 2.62797  | -0.09222 |
| H                      | -0.76571 | 0.46133  | 0.78261  | H | -2.64997 | 3.26453  | -0.02353 |
| C                      | 1.27874  | 1.8118   | -0.34293 | O | 0.78896  | 3.01422  | -0.92743 |
| C                      | 2.80174  | 1.89839  | -0.30663 | H | -0.16802 | 3.05193  | -0.75066 |
| C                      | 3.38402  | 0.61524  | 0.29253  | O | 3.24824  | 3.01598  | 0.44883  |
| C                      | 1.5279   | -0.70268 | -0.60345 | H | 2.74822  | 3.7802   | 0.13361  |
| C                      | 0.8677   | 0.57575  | -1.15107 | O | 2.98383  | 0.47552  | 1.61553  |
| H                      | 4.47275  | 0.61141  | 0.19572  | H | 3.58736  | -0.15433 | 2.06898  |
| H                      | 3.17353  | 1.97456  | -1.33641 | C | 1.31278  | -1.91998 | -1.4951  |
| H                      | 0.92196  | 1.734    | 0.6896   | H | 1.78427  | -2.79119 | -1.02624 |
| H                      | 1.14455  | -0.93452 | 0.39592  | H | 0.24365  | -2.11297 | -1.5749  |
| H                      | 1.19862  | 0.71811  | -2.18136 | O | 1.79875  | -1.73602 | -2.82379 |

|   |         |          |          |
|---|---------|----------|----------|
| H | 2.74718 | -1.56694 | -2.77492 |
| O | 4.76516 | -1.33944 | 2.69471  |
| H | 4.88543 | -1.92727 | 1.9185   |
| H | 4.44972 | -1.90194 | 3.41076  |
| O | 4.88917 | -2.48894 | 0.19706  |
| H | 4.16707 | -1.95606 | -0.18584 |
| H | 4.69046 | -3.40584 | -0.0232  |

**RC<sub>3w</sub>**

|   |          |          |          |
|---|----------|----------|----------|
| C | -3.8843  | 0.83004  | 0.85405  |
| C | -2.89021 | 1.13637  | -0.27134 |
| C | -1.63592 | 0.27107  | -0.13716 |
| C | -2.86642 | -1.45893 | 0.96857  |
| C | -4.18618 | -0.66917 | 0.91924  |
| H | -3.34818 | 0.91488  | -1.24127 |
| H | -3.44807 | 1.14991  | 1.80458  |
| H | -2.37697 | -1.22092 | 1.92469  |
| H | -4.74018 | -0.8819  | 1.84286  |
| H | -1.11016 | 0.51953  | 0.79414  |
| C | 0.80308  | 2.06488  | -0.32254 |
| C | 2.29996  | 2.35464  | -0.22937 |
| C | 3.04121  | 1.17195  | 0.40084  |
| C | 1.368    | -0.39508 | -0.44691 |
| C | 0.57417  | 0.75449  | -1.0896  |
| H | 4.122    | 1.30317  | 0.29767  |

|   |          |          |          |
|---|----------|----------|----------|
| H | 2.69244  | 2.46835  | -1.24831 |
| H | 0.41539  | 1.97969  | 0.69859  |
| H | 1.01573  | -0.57452 | 0.57499  |
| H | 0.92771  | 0.88541  | -2.11419 |
| O | -0.82558 | 0.46814  | -1.25952 |
| O | -1.99871 | -1.10503 | -0.11783 |
| O | 2.75776  | 0.00073  | -0.39109 |
| C | -3.04382 | -2.97282 | 0.91703  |
| H | -2.06831 | -3.45667 | 1.01236  |
| H | -3.67233 | -3.29204 | 1.74948  |
| O | -3.70371 | -3.41288 | -0.28069 |
| H | -3.08446 | -3.32328 | -1.01552 |
| O | -5.00292 | -0.97158 | -0.21406 |
| H | -4.8676  | -1.90663 | -0.44192 |
| O | -5.0698  | 1.60697  | 0.68929  |
| H | -5.59774 | 1.17632  | 0.002    |
| O | -2.48047 | 2.50641  | -0.22062 |
| H | -3.27562 | 3.05374  | -0.18126 |
| O | 0.19326  | 3.17616  | -0.97095 |
| H | -0.76734 | 3.10298  | -0.82778 |
| O | 2.55903  | 3.53411  | 0.51956  |
| H | 1.98144  | 4.22092  | 0.16176  |
| O | 2.67279  | 0.99766  | 1.72684  |
| H | 3.31408  | 0.37643  | 2.14186  |



|   |         |          |          |   |          |          |          |
|---|---------|----------|----------|---|----------|----------|----------|
| C | 1.28547 | -1.72152 | -1.19825 | H | 0.35211  | -0.4832  | 0.86121  |
| H | 1.82266 | -2.48226 | -0.62208 | C | -2.10008 | -1.10626 | -0.13081 |
| H | 0.2363  | -2.01322 | -1.2489  | C | -3.61988 | -0.94093 | -0.08671 |
| O | 1.77815 | -1.66428 | -2.5349  | C | -4.06601 | 0.18352  | 0.85053  |
| H | 2.74221 | -1.75119 | -2.4988  | C | -1.6595  | 1.41869  | 0.04309  |
| O | 5.52819 | -2.55232 | 0.93561  | C | -1.47249 | 0.13504  | -0.78494 |
| H | 5.24952 | -2.34011 | 0.0204   | H | -4.97837 | 0.6876   | 0.51444  |
| H | 5.34997 | -3.49142 | 1.05728  | H | -3.9678  | -0.70237 | -1.10086 |
| O | 4.6005  | -1.6316  | -1.54246 | H | -1.72861 | -1.25199 | 0.89092  |
| H | 4.07652 | -0.90235 | -1.14761 | H | -0.89619 | 1.46791  | 0.82249  |
| H | 5.2672  | -1.21851 | -2.10382 | H | -1.94363 | 0.26628  | -1.76105 |
| O | 4.4758  | -0.7822  | 2.78473  | O | -0.09018 | -0.06523 | -1.12123 |
| H | 5.22043 | -0.42988 | 3.28431  | O | 1.61111  | 0.91872  | 0.01606  |
| H | 4.85873 | -1.42446 | 2.14583  | O | -2.94547 | 1.42844  | 0.74121  |

## TS1

|   |         |          |          |   |         |          |          |
|---|---------|----------|----------|---|---------|----------|----------|
| C | 2.90108 | -1.6042  | 0.50297  | H | 2.52341 | 2.95767  | 1.365    |
| C | 1.74076 | -1.44762 | -0.48647 | H | 4.06179 | 2.22301  | 1.85124  |
| C | 0.84355 | -0.27162 | -0.09824 | O | 3.92985 | 2.62344  | -0.13838 |
| C | 2.65682 | 0.84176  | 0.99688  | H | 3.24601 | 2.84457  | -0.78236 |
| C | 3.65494 | -0.28263 | 0.66846  | O | 4.38448 | -0.07398 | -0.54203 |
| H | 2.13387 | -1.25366 | -1.48989 | H | 4.53359 | 0.88129  | -0.64105 |
| H | 2.49854 | -1.91182 | 1.47218  | O | 3.76177 | -2.66257 | 0.08629  |
| H | 2.22196 | 0.61932  | 1.98254  | H | 4.31564 | -2.31462 | -0.62688 |
| H | 4.35103 | -0.37175 | 1.51269  | O | 0.92139 | -2.6204  | -0.49325 |

|   |          |          |          |   |          |          |          |
|---|----------|----------|----------|---|----------|----------|----------|
| H | 1.48768  | -3.3856  | -0.65689 | C | 3.34793  | 1.35705  | -0.17668 |
| O | -1.85962 | -2.27191 | -0.90758 | C | 3.82417  | 0.17946  | 0.67081  |
| H | -0.91197 | -2.49553 | -0.84644 | C | 1.67295  | -1.13089 | -0.32667 |
| O | -4.25564 | -2.12706 | 0.37033  | C | 1.28316  | 0.19295  | -1.00137 |
| H | -3.82855 | -2.85681 | -0.09999 | H | 4.84946  | -0.12567 | 0.42176  |
| O | -3.87764 | 0.07622  | 2.15423  | H | 3.74972  | 1.23255  | -1.19036 |
| H | -3.04268 | 1.02956  | 1.85105  | H | 1.43239  | 1.45997  | 0.76755  |
| C | -1.57943 | 2.68896  | -0.7979  | H | 1.18435  | -1.21211 | 0.65206  |
| H | -1.61155 | 3.55962  | -0.13502 | H | 1.69695  | 0.20336  | -2.01143 |
| H | -0.63007 | 2.69932  | -1.33567 | O | -0.13363 | 0.29165  | -1.22939 |
| O | -2.6117  | 2.75751  | -1.77724 | O | -1.69817 | -0.91219 | -0.10445 |
| H | -3.45222 | 2.87084  | -1.31732 | O | 3.11085  | -1.16551 | -0.14877 |

### TS1<sub>w</sub>

|   |          |          |          |   |          |          |          |
|---|----------|----------|----------|---|----------|----------|----------|
| C | -3.08825 | 1.45652  | 0.73441  | C | -3.20488 | -2.43271 | 0.92895  |
| C | -2.0049  | 1.47333  | -0.34982 | H | -2.38076 | -3.13485 | 1.07929  |
| C | -1.00938 | 0.332    | -0.13951 | H | -3.9225  | -2.56165 | 1.74034  |
| C | -2.66569 | -1.00614 | 0.95093  | O | -3.90676 | -2.74063 | -0.28605 |
| C | -3.74971 | 0.07863  | 0.82158  | H | -3.25717 | -2.82974 | -0.99427 |
| H | -2.46359 | 1.34205  | -1.3356  | O | -4.57072 | -0.05561 | -0.34043 |
| H | -2.62486 | 1.69374  | 1.6961   | H | -4.65947 | -1.00301 | -0.53811 |
| H | -2.16833 | -0.86031 | 1.92126  | O | -4.0397  | 2.49261  | 0.49627  |
| H | -4.37443 | 0.0394   | 1.72339  | H | -4.62925 | 2.18148  | -0.20526 |
| H | -0.47377 | 0.47653  | 0.80799  | O | -1.26911 | 2.69968  | -0.30601 |
| C | 1.82468  | 1.41949  | -0.2548  | H | -1.90112 | 3.43006  | -0.32437 |
|   |          |          |          | O | 1.50191  | 2.62456  | -0.94223 |

|                         |         |          |          |   |          |          |          |
|-------------------------|---------|----------|----------|---|----------|----------|----------|
| H                       | 0.5487  | 2.78918  | -0.8231  | C | -1.39471 | 1.74564  | 0.35131  |
| O                       | 3.87763 | 2.54274  | 0.40704  | C | -2.91744 | 1.81089  | 0.30129  |
| H                       | 3.39952 | 3.27813  | -0.00078 | C | -3.47757 | 0.5939   | -0.44741 |
| O                       | 3.47584 | 0.12392  | 1.91632  | C | -1.54374 | -0.79292 | 0.61654  |
| H                       | 3.65558 | -1.18467 | 2.18645  | C | -0.9456  | 0.51982  | 1.15493  |
| C                       | 1.29789 | -2.36099 | -1.15394 | H | -4.55488 | 0.4691   | -0.25474 |
| H                       | 1.55612 | -3.26251 | -0.58575 | H | -3.31568 | 1.80905  | 1.32349  |
| H                       | 0.22231 | -2.36115 | -1.3267  | H | -1.03293 | 1.68438  | -0.68011 |
| O                       | 1.92651 | -2.37508 | -2.43283 | H | -1.15864 | -1.00657 | -0.38733 |
| H                       | 2.88089 | -2.35242 | -2.29027 | H | -1.28336 | 0.65016  | 2.18463  |
| O                       | 3.73119 | -2.25678 | 1.88016  | O | 0.48708  | 0.46589  | 1.28651  |
| H                       | 3.38032 | -1.94316 | 0.78461  | O | 1.83644  | -0.97561 | 0.16457  |
| H                       | 3.08432 | -2.80237 | 2.34493  | O | -2.97679 | -0.63567 | 0.55301  |
| <b>TS1<sub>2w</sub></b> |         |          |          | C | 3.11855  | -2.71642 | -0.82303 |
|                         |         |          |          | H | 2.22213  | -3.33976 | -0.87442 |
| C                       | 3.40132 | 1.16524  | -0.94123 | H | 3.77108  | -2.9776  | -1.65717 |
| C                       | 2.39799 | 1.37971  | 0.19623  | O | 3.85785  | -3.00367 | 0.37497  |
| C                       | 1.28039 | 0.33537  | 0.14348  | H | 3.24545  | -2.97525 | 1.1204   |
| C                       | 2.72298 | -1.2474  | -0.93039 | O | 4.78645  | -0.40514 | 0.17935  |
| C                       | 3.9159  | -0.27583 | -0.94666 | H | 4.78951  | -1.33819 | 0.45132  |
| H                       | 2.90577 | 1.27949  | 1.16137  | O | 4.4651   | 2.11194  | -0.84465 |
| H                       | 2.90476 | 1.37269  | -1.89314 | H | 5.06209  | 1.79811  | -0.1507  |
| H                       | 2.1853  | -1.12255 | -1.8821  | O | 1.78657  | 2.66964  | 0.09246  |
| H                       | 4.47888 | -0.45014 | -1.87286 | H | 2.49013  | 3.32785  | 0.02192  |
| H                       | 0.69345 | 0.46406  | -0.77529 |   |          |          |          |

|                         |          |          |          |   |          |          |          |
|-------------------------|----------|----------|----------|---|----------|----------|----------|
| O                       | -0.93184 | 2.95526  | 0.94939  | H | 3.21889  | 1.10833  | -2.01487 |
| H                       | 0.02199  | 3.02284  | 0.76545  | H | 2.22093  | -1.28972 | -1.88017 |
| O                       | -3.35473 | 2.9855   | -0.37838 | H | 4.57322  | -0.88217 | -2.02332 |
| H                       | -2.81211 | 3.71063  | -0.04015 | H | 0.98913  | 0.46867  | -0.76384 |
| O                       | -3.0696  | 0.40925  | -1.66273 | C | -0.90738 | 1.98451  | 0.38468  |
| H                       | -3.79725 | -0.61679 | -2.32826 | C | -2.41802 | 2.18767  | 0.38551  |
| C                       | -1.23877 | -1.98794 | 1.5191   | C | -3.11057 | 0.95768  | -0.23182 |
| H                       | -1.63366 | -2.90182 | 1.05997  | C | -1.30912 | -0.49725 | 0.8156   |
| H                       | -0.15845 | -2.09704 | 1.60678  | C | -0.54017 | 0.76719  | 1.23994  |
| O                       | -1.74661 | -1.82999 | 2.84278  | H | -4.19504 | 0.9889   | -0.02885 |
| H                       | -2.69722 | -1.67609 | 2.78016  | H | -2.76854 | 2.31032  | 1.41826  |
| O                       | -4.36808 | -1.46364 | -2.63692 | H | -0.6018  | 1.83072  | -0.65473 |
| H                       | -4.36384 | -2.14215 | -1.45278 | H | -1.01271 | -0.80638 | -0.19339 |
| H                       | -3.89126 | -1.9106  | -3.34563 | H | -0.8019  | 0.99191  | 2.27535  |
| O                       | -4.31614 | -2.43324 | -0.39983 | O | 0.88529  | 0.56477  | 1.30395  |
| H                       | -3.64265 | -1.68088 | 0.09399  | O | 2.01601  | -1.05389 | 0.17668  |
| H                       | -3.99008 | -3.33733 | -0.30392 | O | -2.71466 | -0.17838 | 0.81472  |
| <b>TS1<sub>3w</sub></b> |          |          |          | C | 3.03253  | -2.95355 | -0.82941 |
|                         |          |          |          | H | 2.07004  | -3.47122 | -0.80686 |
| C                       | 3.73977  | 0.86844  | -1.08364 | H | 3.59642  | -3.30712 | -1.69367 |
| C                       | 2.82744  | 1.22298  | 0.09589  | O | 3.81013  | -3.29607 | 0.32906  |
| C                       | 1.60147  | 0.30839  | 0.13289  | H | 3.2546   | -3.17897 | 1.10949  |
| C                       | 2.79796  | -1.45212 | -0.95751 | O | 5.00491  | -0.81934 | 0.00622  |
| C                       | 4.08889  | -0.62207 | -1.07299 | H | 4.92944  | -1.74253 | 0.30001  |
| H                       | 3.37143  | 1.09092  | 1.0374   |   |          |          |          |

|   |          |          |          |
|---|----------|----------|----------|
| O | 4.90637  | 1.69025  | -1.06916 |
| H | 5.50164  | 1.32499  | -0.39934 |
| O | 2.35838  | 2.57018  | -0.01827 |
| H | 3.12516  | 3.14206  | -0.15288 |
| O | -0.30325 | 3.17665  | 0.88849  |
| H | 0.64423  | 3.13585  | 0.66954  |
| O | -2.77678 | 3.33909  | -0.37675 |
| H | -2.17012 | 4.04228  | -0.10968 |
| O | -2.75855 | 0.64919  | -1.44925 |
| H | -3.76062 | 0.01432  | -2.28599 |
| C | -1.08036 | -1.67369 | 1.76089  |
| H | -1.65826 | -2.53504 | 1.40774  |
| H | -0.02395 | -1.93878 | 1.73881  |
| O | -1.39513 | -1.38164 | 3.12384  |
| H | -2.32528 | -1.13304 | 3.17654  |
| O | -5.39935 | -2.34598 | -1.43079 |
| H | -4.85212 | -2.18772 | -0.26275 |
| H | -5.21322 | -3.20775 | -1.82282 |
| O | -4.37602 | -2.02175 | 0.7419   |
| H | -3.65184 | -1.23926 | 0.752    |
| H | -5.04607 | -1.85228 | 1.41773  |
| O | -4.45792 | -0.49381 | -2.88456 |
| H | -5.08243 | 0.1555   | -3.22462 |
| H | -5.06144 | -1.61597 | -2.07376 |

## IM1

|   |          |          |          |
|---|----------|----------|----------|
| C | 2.69612  | -1.77928 | 0.40779  |
| C | 1.55745  | -1.47122 | -0.57082 |
| C | 0.73032  | -0.27531 | -0.09596 |
| C | 2.60132  | 0.63242  | 1.08833  |
| C | 3.53057  | -0.52619 | 0.6856   |
| H | 1.96987  | -1.22267 | -1.55434 |
| H | 2.26385  | -2.13858 | 1.34562  |
| H | 2.13901  | 0.36616  | 2.05039  |
| H | 4.20594  | -0.72669 | 1.52743  |
| H | 0.22621  | -0.51975 | 0.84844  |
| C | -2.22061 | -0.92876 | -0.17828 |
| C | -3.74317 | -0.82295 | 0.03749  |
| C | -4.12305 | -0.14775 | 1.36085  |
| C | -1.66552 | 1.62774  | 0.07244  |
| C | -1.55668 | 0.33968  | -0.76147 |
| H | -5.05577 | 0.44152  | 1.3429   |
| H | -4.20779 | -0.27913 | -0.79158 |
| H | -1.76758 | -1.1964  | 0.78181  |
| H | -1.21219 | 1.48246  | 1.05993  |
| H | -2.01702 | 0.52821  | -1.73331 |
| O | -0.18401 | 0.05543  | -1.10204 |
| O | 1.57922  | 0.84945  | 0.10494  |
| O | -3.07453 | 1.88955  | 0.21388  |

|                        |          |          |          |   |          |          |          |
|------------------------|----------|----------|----------|---|----------|----------|----------|
| C                      | 3.31584  | 1.96572  | 1.28396  | C | -1.92805 | 1.51644  | -0.31432 |
| H                      | 2.59619  | 2.71812  | 1.61665  | C | -0.97415 | 0.3353   | -0.12789 |
| H                      | 4.08283  | 1.85589  | 2.05177  | C | -2.67532 | -0.9474  | 0.96506  |
| O                      | 3.99098  | 2.41174  | 0.09688  | C | -3.71628 | 0.18067  | 0.85991  |
| H                      | 3.32476  | 2.71172  | -0.53364 | H | -2.40059 | 1.41486  | -1.29697 |
| O                      | 4.29278  | -0.27253 | -0.49627 | H | -2.52029 | 1.73978  | 1.7397   |
| H                      | 4.49499  | 0.67767  | -0.52472 | H | -2.1622  | -0.83194 | 1.93123  |
| O                      | 3.49401  | -2.85275 | -0.08854 | H | -4.33243 | 0.15628  | 1.7681   |
| H                      | 4.07455  | -2.48347 | -0.76904 | H | -0.4247  | 0.44578  | 0.81676  |
| O                      | 0.66992  | -2.58889 | -0.67582 | C | 1.90745  | 1.29914  | -0.30348 |
| H                      | 1.19086  | -3.37058 | -0.90061 | C | 3.44909  | 1.33309  | -0.2638  |
| O                      | -2.04678 | -2.00327 | -1.10461 | C | 4.05654  | 0.48686  | 0.8567   |
| H                      | -1.11862 | -2.30097 | -1.06164 | C | 1.57337  | -1.30375 | -0.37425 |
| O                      | -4.31237 | -2.13256 | 0.13189  | C | 1.30262  | 0.06758  | -1.01779 |
| H                      | -3.76097 | -2.69062 | -0.4402  | H | 5.00251  | -0.02147 | 0.60905  |
| O                      | -3.51479 | -0.32378 | 2.39209  | H | 3.85485  | 0.99356  | -1.22339 |
| H                      | -3.19881 | 2.56183  | 0.89533  | H | 1.5418   | 1.36867  | 0.72684  |
| C                      | -0.99838 | 2.83194  | -0.59866 | H | 1.14366  | -1.33747 | 0.63345  |
| H                      | -1.08458 | 3.69328  | 0.07656  | H | 1.70085  | 0.05253  | -2.03458 |
| H                      | 0.0578   | 2.63064  | -0.76421 | O | -0.11092 | 0.27801  | -1.22689 |
| O                      | -1.5729  | 3.13316  | -1.86905 | O | -1.71612 | -0.87942 | -0.09969 |
| H                      | -2.52089 | 3.26077  | -1.73804 | O | 2.9975   | -1.46714 | -0.30086 |
| <b>IM1<sub>w</sub></b> |          |          |          | C | -3.27136 | -2.3509  | 0.93396  |
| C                      | -3.00113 | 1.53121  | 0.78005  | H | -2.47442 | -3.08735 | 1.06574  |

|                         |          |          |          |   |          |          |          |
|-------------------------|----------|----------|----------|---|----------|----------|----------|
| H                       | -3.98348 | -2.46005 | 1.75302  | C | -3.29146 | 1.23944  | 1.06041  |
| O                       | -4.00037 | -2.61617 | -0.27508 | C | -2.32297 | 1.44962  | -0.10777 |
| H                       | -3.36396 | -2.71974 | -0.99324 | C | -1.24345 | 0.36531  | -0.1277  |
| O                       | -4.5546  | 0.09331  | -0.29437 | C | -2.70241 | -1.19504 | 0.95717  |
| H                       | -4.68869 | -0.84729 | -0.49876 | C | -3.85683 | -0.18263 | 1.04896  |
| O                       | -3.91251 | 2.60663  | 0.56011  | H | -2.86785 | 1.39908  | -1.05622 |
| H                       | -4.52193 | 2.32401  | -0.13648 | H | -2.75243 | 1.40446  | 1.99739  |
| O                       | -1.14539 | 2.71297  | -0.2632  | H | -2.1228  | -1.11846 | 1.88912  |
| H                       | -1.74528 | 3.46963  | -0.29054 | H | -4.3885  | -0.36277 | 1.99235  |
| O                       | 1.53819  | 2.47764  | -1.02232 | H | -0.61974 | 0.44456  | 0.77282  |
| H                       | 0.59589  | 2.66373  | -0.84961 | C | 1.50147  | 1.62525  | -0.41754 |
| O                       | 3.89811  | 2.66376  | 0.00532  | C | 3.0337   | 1.79547  | -0.48112 |
| H                       | 3.23744  | 3.24094  | -0.41095 | C | 3.78322  | 0.89855  | 0.50497  |
| O                       | 3.60429  | 0.4475   | 1.98274  | C | 1.41296  | -0.96946 | -0.78437 |
| H                       | 3.72083  | -1.57005 | 2.58884  | C | 0.95227  | 0.42954  | -1.22785 |
| C                       | 0.99661  | -2.46783 | -1.18751 | H | 4.73371  | 0.47369  | 0.14956  |
| H                       | 1.13429  | -3.39061 | -0.61    | H | 3.39323  | 1.59072  | -1.49501 |
| H                       | -0.06744 | -2.32387 | -1.36231 | H | 1.21569  | 1.5438   | 0.63689  |
| O                       | 1.62382  | -2.58222 | -2.46455 | H | 1.07371  | -1.17134 | 0.23885  |
| H                       | 2.57656  | -2.6126  | -2.30648 | H | 1.25501  | 0.57383  | -2.26705 |
| O                       | 3.71177  | -2.4519  | 2.18414  | O | -0.48755 | 0.51131  | -1.2948  |
| H                       | 3.20736  | -2.00603 | 0.48984  | O | -1.85095 | -0.92201 | -0.16528 |
| H                       | 3.183    | -3.0076  | 2.768    | O | 2.84421  | -0.97055 | -0.83612 |
| <b>IM1<sub>2w</sub></b> |          |          |          | C | -3.15469 | -2.64559 | 0.82438  |





|   |          |          |          |                       |          |          |          |
|---|----------|----------|----------|-----------------------|----------|----------|----------|
| O | 0.92509  | 0.69018  | 1.29765  | H                     | -1.96667 | -1.1676  | 3.47612  |
| O | 2.03261  | -0.98468 | 0.22164  | O                     | -5.14172 | -2.81703 | -1.92289 |
| O | -2.56362 | -0.46125 | 1.25895  | H                     | -4.267   | -2.80531 | -0.40972 |
| C | 3.05732  | -2.92667 | -0.69297 | H                     | -4.86538 | -3.47244 | -2.57266 |
| H | 2.12936  | -3.48202 | -0.53427 | O                     | -3.76554 | -2.76384 | 0.43794  |
| H | 3.5612   | -3.33632 | -1.56946 | H                     | -3.01498 | -1.27714 | 0.93615  |
| O | 3.95051  | -3.1205  | 0.41523  | H                     | -4.32305 | -3.18845 | 1.09902  |
| H | 3.4595   | -2.95774 | 1.22993  | O                     | -4.88887 | -0.32998 | -3.03821 |
| O | 4.97679  | -0.63479 | -0.24235 | H                     | -5.68843 | 0.18285  | -3.19959 |
| H | 4.97547  | -1.52732 | 0.14221  | H                     | -5.08329 | -1.94405 | -2.37425 |
| O | 4.65297  | 1.74991  | -1.53392 |                       |          |          |          |
| H | 5.32367  | 1.47663  | -0.89204 | <b>TS<sub>R</sub></b> |          |          |          |
| O | 2.15798  | 2.61147  | -0.34553 | C                     | -2.44382 | 1.7603   | 0.       |
| H | 2.87631  | 3.21319  | -0.57998 | C                     | -3.52464 | 2.16647  | -1.00263 |
| O | -0.33941 | 3.11205  | 0.84772  | C                     | -4.28127 | 3.39616  | -0.50978 |
| H | 0.56875  | 3.0652   | 0.49412  | C                     | -2.38052 | 4.1569   | 0.71679  |
| O | -2.79431 | 3.56513  | 0.20543  | C                     | -1.52953 | 2.94395  | 0.31352  |
| H | -1.97001 | 4.05549  | 0.35853  | H                     | -3.06555 | 2.41752  | -1.96396 |
| O | -3.18716 | 1.09571  | -1.35742 | H                     | -2.92812 | 1.4238   | 0.92027  |
| H | -4.3275  | 0.22045  | -2.45269 | H                     | -2.87543 | 3.91351  | 1.66778  |
| C | -0.66211 | -1.6773  | 2.12603  | H                     | -0.88692 | 2.68493  | 1.16419  |
| H | -1.09446 | -2.64552 | 1.84574  | H                     | -4.80271 | 3.16174  | 0.42698  |
| H | 0.42273  | -1.75874 | 2.0917   | C                     | -7.21752 | 2.83851  | -0.6651  |
| O | -1.01683 | -1.34292 | 3.46839  | C                     | -8.74774 | 2.92174  | -0.36414 |
|   |          |          |          | C                     | -8.9994  | 3.34951  | 1.08445  |

|   |          |         |          |            |          |          |          |
|---|----------|---------|----------|------------|----------|----------|----------|
| C | -6.58567 | 5.35791 | -0.20932 | H          | -8.74183 | 1.17929  | -1.16428 |
| C | -6.5253  | 4.13239 | -1.14153 | O          | -8.94479 | 2.5713   | 2.00976  |
| H | -9.22959 | 4.41147 | 1.24099  | H          | -8.16373 | 6.29872  | -0.81814 |
| H | -9.21859 | 3.64925 | -1.03417 | C          | -5.78579 | 6.53904  | -0.74868 |
| H | -6.72741 | 2.45553 | 0.23614  | H          | -5.81161 | 7.33972  | -0.00356 |
| H | -6.20872 | 5.1038  | 0.78463  | H          | -4.7529  | 6.25437  | -0.94172 |
| H | -6.98063 | 4.41075 | -2.09346 | O          | -6.44631 | 6.95863  | -1.95435 |
| O | -5.16679 | 3.80911 | -1.50718 | H          | -6.15782 | 7.84974  | -2.17453 |
| O | -3.36656 | 4.45777 | -0.2781  |            |          |          |          |
| O | -7.94718 | 5.75867 | -0.04398 | <b>IM2</b> |          |          |          |
| C | -1.58    | 5.43514 | 0.92424  | C          | -2.87632 | -1.70652 | -0.49573 |
| H | -2.2441  | 6.226   | 1.28151  | C          | -1.70535 | -1.50028 | 0.47224  |
| H | -0.80427 | 5.26479 | 1.67107  | C          | -0.8391  | -0.31445 | 0.04697  |
| O | -0.90822 | 5.85197 | -0.27463 | C          | -2.68938 | 0.73274  | -1.04983 |
| H | -1.57998 | 6.15122 | -0.90004 | C          | -3.66003 | -0.40541 | -0.68756 |
| O | -0.72927 | 3.16023 | -0.84957 | H          | -2.08729 | -1.29368 | 1.47744  |
| H | -0.49306 | 4.10248 | -0.88077 | H          | -2.48016 | -2.03281 | -1.4614  |
| O | -1.71462 | 0.63883 | -0.49301 | H          | -2.2566  | 0.49752  | -2.03347 |
| H | -1.09446 | 0.97639 | -1.15472 | H          | -4.36086 | -0.53065 | -1.52321 |
| O | -4.47565 | 1.11166 | -1.16697 | H          | -0.36111 | -0.53214 | -0.91818 |
| H | -3.99301 | 0.30025 | -1.37082 | C          | 2.15024  | -0.99827 | 0.05881  |
| O | -7.08826 | 1.86848 | -1.70426 | C          | 3.69442  | -0.94306 | -0.00695 |
| H | -6.18347 | 1.50363 | -1.65825 | C          | 4.2772   | -0.21262 | -1.21566 |
| O | -9.32663 | 1.63997 | -0.54001 | C          | 1.51698  | 1.53415  | -0.15662 |
|   |          |         |          | C          | 1.4665   | 0.24297  | 0.6857   |

|   |          |          |          |
|---|----------|----------|----------|
| H | 3.6772   | -0.26112 | -2.14198 |
| H | 4.10176  | -0.50529 | 0.91193  |
| H | 1.7684   | -1.17491 | -0.95582 |
| H | 0.90306  | 1.41458  | -1.05181 |
| H | 1.9422   | 0.42854  | 1.65126  |
| O | 0.10636  | -0.0783  | 1.05089  |
| O | -1.64007 | 0.85429  | -0.07872 |
| O | 2.85042  | 1.77124  | -0.61299 |
| C | -3.35025 | 2.1026   | -1.16253 |
| H | -2.60596 | 2.84152  | -1.4702  |
| H | -4.13412 | 2.06382  | -1.92016 |
| O | -3.98653 | 2.51358  | 0.05807  |
| H | -3.29851 | 2.75712  | 0.68947  |
| O | -4.38521 | -0.18319 | 0.52357  |
| H | -4.55113 | 0.77118  | 0.60273  |
| O | -3.7104  | -2.76941 | -0.03844 |
| H | -4.26202 | -2.41161 | 0.67161  |
| O | -0.85756 | -2.65232 | 0.49106  |
| H | -1.39413 | -3.42617 | 0.70518  |
| O | 1.87744  | -2.13941 | 0.87406  |
| H | 0.93247  | -2.37387 | 0.80485  |
| O | 4.20142  | -2.2728  | -0.17989 |
| H | 3.55058  | -2.85152 | 0.25088  |
| O | 5.39227  | 0.25688  | -1.21326 |

|   |         |         |          |
|---|---------|---------|----------|
| H | 3.30813 | 2.24622 | 0.09765  |
| C | 1.01844 | 2.7529  | 0.61438  |
| H | 0.94326 | 3.60017 | -0.07374 |
| H | 0.03731 | 2.55249 | 1.04819  |
| O | 1.99426 | 3.02339 | 1.63323  |
| H | 1.86821 | 3.92047 | 1.95873  |

### IM2<sub>w</sub>

|   |          |          |          |
|---|----------|----------|----------|
| C | -3.17095 | -1.46153 | -0.78856 |
| C | -2.08261 | -1.47036 | 0.29064  |
| C | -1.09285 | -0.32433 | 0.07744  |
| C | -2.76103 | 1.00201  | -1.01139 |
| C | -3.83948 | -0.08722 | -0.87668 |
| H | -2.53721 | -1.34247 | 1.27862  |
| H | -2.7107  | -1.69937 | -1.75153 |
| H | -2.26433 | 0.85577  | -1.98192 |
| H | -4.46755 | -0.05317 | -1.77632 |
| H | -0.55959 | -0.46466 | -0.8724  |
| C | 1.774    | -1.36143 | 0.23323  |
| C | 3.31538  | -1.4623  | 0.17047  |
| C | 3.9406   | -0.65174 | -0.9594  |
| C | 1.49881  | 1.24279  | 0.26655  |
| C | 1.19909  | -0.10822 | 0.93799  |
| H | 3.29604  | -0.48625 | -1.84203 |
| H | 3.76598  | -1.16608 | 1.12366  |

|   |          |          |          |
|---|----------|----------|----------|
| H | 1.3935   | -1.42406 | -0.79498 |
| H | 1.04928  | 1.28102  | -0.73257 |
| H | 1.61022  | -0.08348 | 1.94915  |
| O | -0.2144  | -0.28609 | 1.1654   |
| O | -1.79217 | 0.91446  | 0.04326  |
| O | 2.92376  | 1.31353  | 0.17278  |
| C | -3.3063  | 2.42631  | -0.99248 |
| H | -2.48534 | 3.13151  | -1.14533 |
| H | -4.02527 | 2.5499   | -1.80348 |
| O | -4.0083  | 2.73437  | 0.22256  |
| H | -3.35806 | 2.83247  | 0.92898  |
| O | -4.65697 | 0.04586  | 0.28807  |
| H | -4.74987 | 0.99341  | 0.48328  |
| O | -4.1165  | -2.50111 | -0.54252 |
| H | -4.70561 | -2.18934 | 0.1591   |
| O | -1.33819 | -2.69126 | 0.24285  |
| H | -1.95941 | -3.42929 | 0.29223  |
| O | 1.36702  | -2.52616 | 0.95327  |
| H | 0.41511  | -2.67498 | 0.79632  |
| O | 3.67884  | -2.81014 | -0.15101 |
| H | 2.97715  | -3.36106 | 0.23349  |
| O | 5.10593  | -0.31517 | -0.97293 |
| H | 5.01816  | 1.67367  | -1.81077 |
| C | 0.98668  | 2.43918  | 1.07478  |

|   |          |         |          |
|---|----------|---------|----------|
| H | 1.17053  | 3.35091 | 0.49234  |
| H | -0.08389 | 2.35011 | 1.24862  |
| O | 1.6157   | 2.52923 | 2.35282  |
| H | 2.56967  | 2.51728 | 2.20139  |
| O | 4.39982  | 2.41778 | -1.88055 |
| H | 3.21715  | 1.92197 | -0.53431 |
| H | 4.9396   | 3.21479 | -1.82898 |

### IM2<sub>2w</sub>

|   |          |          |          |
|---|----------|----------|----------|
| C | 3.50794  | 1.21217  | -1.04034 |
| C | 2.49285  | 1.43354  | 0.08542  |
| C | 1.39952  | 0.36353  | 0.05946  |
| C | 2.87623  | -1.21253 | -0.9766  |
| C | 4.04969  | -0.21869 | -1.01124 |
| H | 2.99613  | 1.3789   | 1.05623  |
| H | 3.01288  | 1.38939  | -1.99902 |
| H | 2.33694  | -1.11898 | -1.93089 |
| H | 4.61998  | -0.40265 | -1.93106 |
| H | 0.81085  | 0.45937  | -0.86338 |
| C | -1.38544 | 1.61016  | 0.2788   |
| C | -2.91235 | 1.82854  | 0.37916  |
| C | -3.73735 | 0.97477  | -0.57349 |
| C | -1.23934 | -0.98356 | 0.57731  |
| C | -0.83173 | 0.40896  | 1.08289  |
| H | -3.24637 | 0.68597  | -1.51775 |

|   |          |          |          |                         |          |          |          |
|---|----------|----------|----------|-------------------------|----------|----------|----------|
| H | -3.25981 | 1.66549  | 1.40538  | C                       | -0.81952 | -2.10285 | 1.53736  |
| H | -1.12289 | 1.51183  | -0.78314 | H                       | -1.04399 | -3.0675  | 1.06473  |
| H | -0.7788  | -1.17455 | -0.39877 | H                       | 0.25079  | -2.05483 | 1.7308   |
| H | -1.17115 | 0.51964  | 2.11482  | O                       | -1.48224 | -1.99878 | 2.79696  |
| O | 0.60277  | 0.51747  | 1.19853  | H                       | -2.42742 | -1.92124 | 2.61194  |
| O | 1.98358  | -0.93328 | 0.112    | O                       | -3.67521 | -2.84407 | -1.26956 |
| O | -2.66303 | -0.97603 | 0.45617  | H                       | -2.95888 | -1.70699 | -0.13585 |
| C | 3.29939  | -2.67114 | -0.83759 | H                       | -3.91836 | -3.70759 | -0.91777 |
| H | 2.41483  | -3.31206 | -0.87532 | O                       | -5.84008 | -1.31353 | -2.03575 |
| H | 3.95628  | -2.93736 | -1.66675 | H                       | -6.75105 | -1.57581 | -1.86299 |
| O | 4.04467  | -2.91876 | 0.36538  | H                       | -4.51237 | -2.42794 | -1.57391 |
| H | 3.43176  | -2.89173 | 1.11042  |                         |          |          |          |
| O | 4.91697  | -0.30521 | 0.12128  | <b>IM2<sub>3w</sub></b> |          |          |          |
| H | 4.94158  | -1.23258 | 0.41104  | C                       | 3.83019  | 0.93952  | -1.26385 |
| O | 4.55298  | 2.18006  | -0.95757 | C                       | 2.89834  | 1.34469  | -0.11618 |
| H | 5.15348  | 1.88976  | -0.25644 | C                       | 1.73611  | 0.36083  | 0.02499  |
| O | 1.84373  | 2.70008  | -0.06392 | C                       | 3.03593  | -1.41354 | -0.9184  |
| H | 2.52019  | 3.38812  | -0.10511 | C                       | 4.2715   | -0.51897 | -1.11969 |
| O | -0.82305 | 2.81726  | 0.79483  | H                       | 3.45168  | 1.34918  | 0.82871  |
| H | 0.12325  | 2.85861  | 0.55844  | H                       | 3.29453  | 1.06135  | -2.20929 |
| O | -3.22374 | 3.16285  | -0.0393  | H                       | 2.4446   | -1.3723  | -1.84527 |
| H | -2.43826 | 3.68871  | 0.18576  | H                       | 4.77016  | -0.83439 | -2.04532 |
| O | -4.91978 | 0.75654  | -0.39286 | H                       | 1.10269  | 0.40404  | -0.87168 |
| H | -5.67953 | -0.51827 | -1.4877  | C                       | -0.95328 | 1.82207  | 0.26837  |
|   |          |          |          | C                       | -2.44485 | 2.17028  | 0.4747   |

|   |          |          |          |            |          |          |          |
|---|----------|----------|----------|------------|----------|----------|----------|
| C | -3.42668 | 1.31908  | -0.31773 | O          | -2.69589 | 3.48512  | -0.03725 |
| C | -0.94487 | -0.73555 | 0.79685  | H          | -1.85315 | 3.95929  | 0.05949  |
| C | -0.42471 | 0.66544  | 1.15085  | O          | -4.59244 | 1.21403  | 0.01202  |
| H | -3.07359 | 0.93763  | -1.28945 | H          | -5.8625  | 0.41472  | -0.99118 |
| H | -2.70646 | 2.12568  | 1.53792  | C          | -0.57091 | -1.78199 | 1.85269  |
| H | -0.79259 | 1.59843  | -0.79492 | H          | -0.87315 | -2.77024 | 1.485    |
| H | -0.5248  | -1.05271 | -0.16461 | H          | 0.50587  | -1.78825 | 2.01431  |
| H | -0.69423 | 0.89088  | 2.18472  | O          | -1.18562 | -1.50998 | 3.11214  |
| O | 1.01832  | 0.68617  | 1.18047  | H          | -2.13069 | -1.39766 | 2.94548  |
| O | 2.23611  | -0.96194 | 0.18408  | O          | -3.2347  | -2.81608 | -0.71133 |
| O | -2.36819 | -0.64706 | 0.70099  | H          | -2.69978 | -1.41686 | 0.18016  |
| C | 3.36275  | -2.88005 | -0.65719 | H          | -2.6947  | -3.07275 | -1.46688 |
| H | 2.43355  | -3.4493  | -0.57207 | O          | -6.51068 | -0.07113 | -1.54362 |
| H | 3.93731  | -3.27686 | -1.49529 | H          | -7.38097 | 0.21008  | -1.24043 |
| O | 4.17243  | -3.0685  | 0.51453  | H          | -4.16551 | -2.8028  | -1.03624 |
| H | 3.61812  | -2.92188 | 1.29077  | O          | -5.81883 | -2.7202  | -1.59674 |
| O | 5.19853  | -0.55913 | -0.03253 | H          | -6.45655 | -3.25295 | -1.10927 |
| H | 5.18704  | -1.45758 | 0.33795  | H          | -6.1509  | -1.7942  | -1.55934 |
| O | 4.94334  | 1.82921  | -1.32979 |            |          |          |          |
| H | 5.56193  | 1.55995  | -0.63605 |            |          |          |          |
| O | 2.33038  | 2.63471  | -0.36265 |            |          |          |          |
| H | 3.04883  | 3.26407  | -0.50559 |            |          |          |          |
| O | -0.26488 | 3.02582  | 0.6101   |            |          |          |          |
| H | 0.66307  | 2.96637  | 0.31249  |            |          |          |          |
|   |          |          |          | <b>TS2</b> |          |          |          |
|   |          |          |          | C          | 3.00494  | -1.55987 | 0.47272  |
|   |          |          |          | C          | 1.81379  | -1.43168 | -0.48359 |
|   |          |          |          | C          | 0.88694  | -0.29411 | -0.05374 |
|   |          |          |          | C          | 2.68895  | 0.87062  | 1.0039   |
|   |          |          |          | C          | 3.71628  | -0.21473 | 0.63738  |

|   |          |          |          |                        |          |          |          |
|---|----------|----------|----------|------------------------|----------|----------|----------|
| H | 2.17253  | -1.21002 | -1.49423 | H                      | 4.52434  | 0.99365  | -0.67841 |
| H | 2.63973  | -1.89488 | 1.44761  | O                      | 3.89085  | -2.58125 | 0.01814  |
| H | 2.28828  | 0.62251  | 1.99785  | H                      | 4.41109  | -2.20422 | -0.70549 |
| H | 4.43525  | -0.28968 | 1.46354  | O                      | 1.03712  | -2.63289 | -0.48594 |
| H | 0.43441  | -0.53384 | 0.91793  | H                      | 1.62621  | -3.37579 | -0.67046 |
| C | -2.0278  | -1.21192 | 0.01042  | O                      | -1.77174 | -2.37667 | -0.76193 |
| C | -3.5493  | -1.10576 | 0.11711  | H                      | -0.81475 | -2.56468 | -0.73708 |
| C | -4.01166 | 0.04979  | 1.00703  | O                      | -4.10095 | -2.289   | 0.68568  |
| C | -1.66539 | 1.30914  | 0.18792  | H                      | -3.67862 | -3.03309 | 0.23466  |
| C | -1.46146 | 0.04729  | -0.66817 | O                      | -5.04568 | 0.78089  | 0.60872  |
| H | -3.93613 | -0.19626 | 2.07249  | H                      | -4.01846 | 1.60867  | 0.3695   |
| H | -3.96048 | -0.94304 | -0.88699 | C                      | -1.53111 | 2.60894  | -0.58561 |
| H | -1.61158 | -1.33462 | 1.01976  | H                      | -1.66177 | 3.44911  | 0.10422  |
| H | -0.94164 | 1.32366  | 1.00553  | H                      | -0.52076 | 2.65134  | -1.00374 |
| H | -1.96869 | 0.17176  | -1.62619 | O                      | -2.5238  | 2.63183  | -1.61086 |
| O | -0.08517 | -0.11179 | -1.04541 | H                      | -2.47166 | 3.4762   | -2.07095 |
| O | 1.61542  | 0.92136  | 0.05171  |                        |          |          |          |
| O | -2.98156 | 1.29592  | 0.81222  | <b>TS2<sub>w</sub></b> |          |          |          |
| C | 3.2723   | 2.27685  | 1.09116  | C                      | -3.25681 | 1.40274  | 0.68332  |
| H | 2.4911   | 2.97621  | 1.39983  | C                      | -2.14828 | 1.40046  | -0.3747  |
| H | 4.06586  | 2.29084  | 1.83954  | C                      | -1.12745 | 0.29791  | -0.08924 |
| O | 3.87044  | 2.70826  | -0.14144 | C                      | -2.77408 | -1.03465 | 1.0238   |
| H | 3.16323  | 2.91225  | -0.76551 | C                      | -3.88284 | 0.01192  | 0.81608  |
| O | 4.40927  | 0.03291  | -0.58745 | H                      | -2.57899 | 1.21103  | -1.36363 |
|   |          |          |          | H                      | -2.82399 | 1.69569  | 1.64398  |





|   |          |          |          |                         |          |          |          |
|---|----------|----------|----------|-------------------------|----------|----------|----------|
| H | 3.1153   | 1.43199  | -1.85461 | O                       | 4.65453  | 2.09991  | -0.73035 |
| H | 2.35809  | -1.04897 | -1.97395 | H                       | 5.22736  | 1.74665  | -0.035   |
| H | 4.66266  | -0.41355 | -1.8721  | O                       | 1.95304  | 2.65351  | 0.15063  |
| H | 0.86339  | 0.50498  | -0.84059 | H                       | 2.66297  | 3.30838  | 0.13561  |
| C | -1.26702 | 1.72501  | 0.27673  | O                       | -0.79012 | 2.91592  | 0.89801  |
| C | -2.7883  | 1.83164  | 0.20861  | H                       | 0.17123  | 2.96522  | 0.74653  |
| C | -3.41348 | 0.65234  | -0.5395  | O                       | -3.15547 | 3.01702  | -0.49763 |
| C | -1.41193 | -0.81013 | 0.43744  | H                       | -2.563   | 3.71243  | -0.17996 |
| C | -0.83254 | 0.47572  | 1.04865  | O                       | -4.70373 | 0.59436  | -0.54235 |
| H | -2.90572 | 0.4645   | -1.5021  | H                       | -5.26716 | -0.36967 | -1.41823 |
| H | -3.20705 | 1.85436  | 1.22286  | C                       | -1.13761 | -2.04541 | 1.29705  |
| H | -0.89275 | 1.68245  | -0.75472 | H                       | -1.53868 | -2.93126 | 0.79112  |
| H | -0.9862  | -0.98637 | -0.55938 | H                       | -0.06086 | -2.17271 | 1.4013   |
| H | -1.19794 | 0.56301  | 2.07319  | O                       | -1.6708  | -1.93208 | 2.61518  |
| O | 0.59623  | 0.42314  | 1.2139   | H                       | -2.61839 | -1.76562 | 2.53981  |
| O | 1.95811  | -0.99014 | 0.06767  | O                       | -4.00084 | -2.56991 | -0.64439 |
| O | -2.84076 | -0.6508  | 0.33409  | H                       | -3.45683 | -1.72387 | -0.15634 |
| C | 3.24058  | -2.70408 | -0.96782 | H                       | -4.40844 | -3.13842 | 0.02274  |
| H | 2.33641  | -3.30991 | -1.06869 | O                       | -5.54377 | -1.23593 | -1.97519 |
| H | 3.90798  | -2.93626 | -1.79877 | H                       | -6.49334 | -1.37344 | -1.88117 |
| O | 3.94764  | -3.05913 | 0.2313   | H                       | -4.77499 | -2.1025  | -1.26234 |
| H | 3.31754  | -3.06411 | 0.96222  |                         |          |          |          |
| O | 4.91081  | -0.46518 | 0.1881   |                         |          |          |          |
| H | 4.89459  | -1.40983 | 0.41604  |                         |          |          |          |
|   |          |          |          | <b>TS2<sub>3w</sub></b> |          |          |          |
|   |          |          |          | C                       | 3.93505  | 0.98951  | -1.03871 |
|   |          |          |          | C                       | 2.96886  | 1.26932  | 0.11791  |

|   |          |          |          |   |          |          |          |
|---|----------|----------|----------|---|----------|----------|----------|
| C | 1.76998  | 0.32013  | 0.07282  | O | 4.05674  | -3.23351 | 0.1895   |
| C | 3.05227  | -1.3564  | -1.05366 | H | 3.46506  | -3.16824 | 0.9492   |
| C | 4.32354  | -0.49069 | -1.07832 | O | 5.19955  | -0.71382 | 0.02867  |
| H | 3.48116  | 1.11743  | 1.0739   | H | 5.13445  | -1.65012 | 0.28038  |
| H | 3.44371  | 1.25635  | -1.97846 | O | 5.07747  | 1.83922  | -0.94356 |
| H | 2.50717  | -1.16506 | -1.99007 | H | 5.65764  | 1.46021  | -0.26816 |
| H | 4.85305  | -0.69578 | -2.01789 | O | 2.45895  | 2.604    | 0.03727  |
| H | 1.1805   | 0.50948  | -0.83387 | H | 3.20894  | 3.20917  | -0.02776 |
| C | -0.82385 | 1.87814  | 0.33622  | O | -0.2427  | 3.06646  | 0.86981  |
| C | -2.3375  | 2.05391  | 0.36559  | H | 0.71107  | 3.04658  | 0.67232  |
| C | -3.07351 | 0.86185  | -0.26584 | O | -2.70161 | 3.21837  | -0.3782  |
| C | -1.10562 | -0.62856 | 0.60304  | H | -2.06493 | 3.90385  | -0.13435 |
| C | -0.41874 | 0.63969  | 1.13581  | O | -4.36895 | 0.87622  | -0.15    |
| H | -2.67884 | 0.66715  | -1.28238 | H | -5.25353 | 0.50265  | -1.26952 |
| H | -2.67835 | 2.1525   | 1.40469  | C | -0.86656 | -1.83727 | 1.50997  |
| H | -0.52133 | 1.76948  | -0.71392 | H | -1.31146 | -2.72974 | 1.05584  |
| H | -0.72764 | -0.86981 | -0.40013 | H | 0.2058   | -2.00393 | 1.60379  |
| H | -0.72329 | 0.78709  | 2.17331  | O | -1.37358 | -1.64272 | 2.82913  |
| O | 1.01146  | 0.50304  | 1.23213  | H | -2.30973 | -1.41947 | 2.75381  |
| O | 2.21703  | -1.03112 | 0.06621  | O | -3.78844 | -2.44788 | -0.19145 |
| O | -2.52833 | -0.40373 | 0.5473   | H | -3.28858 | -1.55955 | 0.09232  |
| C | 3.32082  | -2.85596 | -0.98488 | H | -3.26422 | -2.91884 | -0.85351 |
| H | 2.3725   | -3.39776 | -1.02905 | O | -5.90389 | 0.14161  | -1.99614 |
| H | 3.9305   | -3.1536  | -1.83905 | H | -6.66226 | 0.73419  | -2.02789 |

|           |          |          |          |   |          |          |          |
|-----------|----------|----------|----------|---|----------|----------|----------|
| H         | -4.84205 | -2.32545 | -0.56235 | H | 1.89903  | 0.13555  | 1.68836  |
| O         | -6.04241 | -2.21538 | -1.05384 | O | 0.01565  | -0.05738 | 1.088    |
| H         | -6.73509 | -2.32991 | -0.39171 | O | -1.69696 | 1.0078   | 0.05079  |
| H         | -6.12915 | -1.27696 | -1.45363 | O | 2.59269  | 0.96627  | -1.25502 |
| <b>PC</b> |          |          |          | C | -3.37115 | 2.40016  | -0.90152 |
| C         | -3.03747 | -1.46278 | -0.54387 | H | -2.60313 | 3.1315   | -1.16617 |
| C         | -1.86101 | -1.37588 | 0.43361  | H | -4.17014 | 2.45218  | -1.64235 |
| C         | -0.94562 | -0.20036 | 0.08331  | O | -3.96693 | 2.73747  | 0.36156  |
| C         | -2.76408 | 1.0012   | -0.9092  | H | -3.257   | 2.894    | 0.99641  |
| C         | -3.77425 | -0.12401 | -0.62402 | O | -4.48182 | 0.02957  | 0.60787  |
| H         | -2.23654 | -1.2155  | 1.44981  | H | -4.60053 | 0.98059  | 0.76917  |
| H         | -2.65472 | -1.72227 | -1.53492 | O | -3.90748 | -2.53128 | -0.17245 |
| H         | -2.35491 | 0.82783  | -1.91553 | H | -4.4435  | -2.21715 | 0.56947  |
| H         | -4.48541 | -0.15714 | -1.45959 | O | -1.07231 | -2.56874 | 0.38129  |
| H         | -0.48249 | -0.36591 | -0.89891 | H | -1.6659  | -3.32309 | 0.49109  |
| C         | 1.93182  | -1.23706 | 0.06218  | O | 1.73155  | -2.38037 | 0.88069  |
| C         | 3.43416  | -1.06397 | -0.13296 | H | 0.7818   | -2.59537 | 0.84846  |
| C         | 3.71753  | 0.13922  | -1.04723 | O | 4.02416  | -2.21232 | -0.73349 |
| C         | 1.71679  | 1.28648  | -0.14329 | H | 3.73262  | -2.97676 | -0.21915 |
| C         | 1.40282  | 0.04116  | 0.72103  | O | 4.81883  | 0.85824  | -0.49749 |
| H         | 3.9787   | -0.22225 | -2.04281 | H | 5.17993  | 1.43745  | -1.18113 |
| H         | 3.89247  | -0.88375 | 0.84757  | C | 2.22406  | 2.47697  | 0.67326  |
| H         | 1.46688  | -1.39642 | -0.91804 | H | 2.44044  | 3.30242  | -0.01525 |
| H         | 0.80023  | 1.61292  | -0.63809 | H | 1.4207   | 2.79595  | 1.34209  |

|                       |          |          |          |   |          |          |          |
|-----------------------|----------|----------|----------|---|----------|----------|----------|
| O                     | 3.34884  | 2.19219  | 1.4983   | O | -1.85221 | 0.99681  | 0.04698  |
| H                     | 4.07005  | 1.88673  | 0.92142  | O | 3.01414  | 0.92812  | 0.31935  |
| <b>PC<sub>w</sub></b> |          |          |          | C | -3.25506 | 2.58566  | -1.03047 |
| C                     | -3.30952 | -1.30609 | -0.86181 | H | -2.39773 | 3.25391  | -1.14508 |
| C                     | -2.26795 | -1.37561 | 0.26026  | H | -3.93585 | 2.74837  | -1.86716 |
| C                     | -1.21761 | -0.27589 | 0.09611  | O | -3.98897 | 2.91611  | 0.15964  |
| C                     | -2.77491 | 1.13805  | -1.04238 | H | -3.36289 | 2.97819  | 0.8915   |
| C                     | -3.90813 | 0.09951  | -0.96143 | O | -4.76416 | 0.26104  | 0.17164  |
| H                     | -2.75662 | -1.23067 | 1.22968  | H | -4.82023 | 1.21021  | 0.37295  |
| H                     | -2.82296 | -1.55719 | -1.80845 | O | -4.31257 | -2.30161 | -0.66549 |
| H                     | -2.24932 | 0.97729  | -1.99548 | H | -4.91154 | -1.9701  | 0.01849  |
| H                     | -4.49748 | 0.17158  | -1.88476 | O | -1.58506 | -2.63306 | 0.23485  |
| H                     | -0.65544 | -0.43463 | -0.83316 | H | -2.25    | -3.33378 | 0.22289  |
| C                     | 1.54807  | -1.50441 | 0.29263  | O | 1.18107  | -2.71592 | 0.94294  |
| C                     | 3.07137  | -1.48424 | 0.18038  | H | 0.22356  | -2.8392  | 0.81153  |
| C                     | 3.5299   | -0.17058 | -0.45234 | O | 3.52367  | -2.56877 | -0.62359 |
| C                     | 1.58403  | 1.01775  | 0.38624  | H | 3.05926  | -3.35663 | -0.31154 |
| C                     | 1.04655  | -0.26608 | 1.04361  | O | 4.91094  | -0.09668 | -0.42596 |
| H                     | 3.14335  | -0.08856 | -1.4793  | H | 5.21215  | 0.5785   | -1.06769 |
| H                     | 3.51163  | -1.54651 | 1.18462  | C | 1.27471  | 2.28784  | 1.17118  |
| H                     | 1.14843  | -1.50957 | -0.7304  | H | 1.65306  | 3.14651  | 0.60492  |
| H                     | 1.1703   | 1.13432  | -0.62553 | H | 0.19599  | 2.39183  | 1.28161  |
| H                     | 1.42122  | -0.30658 | 2.0678   | O | 1.8285   | 2.27039  | 2.48608  |
| O                     | -0.38148 | -0.28007 | 1.21642  | H | 2.78144  | 2.14603  | 2.3967   |

|                        |          |          |          |   |          |          |          |
|------------------------|----------|----------|----------|---|----------|----------|----------|
| O                      | 5.7645   | 1.81692  | -2.24448 | O | 0.63956  | 0.44431  | 1.21845  |
| H                      | 6.07243  | 2.65607  | -1.88099 | O | 1.96623  | -1.00748 | 0.08388  |
| H                      | 6.43155  | 1.55892  | -2.89208 | O | -2.85438 | -0.53287 | 0.38754  |
| <b>PC<sub>2w</sub></b> |          |          |          | C | 3.21272  | -2.76037 | -0.93017 |
| C                      | 3.61372  | 1.11322  | -0.93858 | H | 2.29844  | -3.35369 | -1.01202 |
| C                      | 2.59459  | 1.32965  | 0.18462  | H | 3.8694   | -3.01833 | -1.76203 |
| C                      | 1.45047  | 0.31835  | 0.08566  | O | 3.92441  | -3.10372 | 0.26971  |
| C                      | 2.86409  | -1.27748 | -1.00293 | H | 3.30017  | -3.08671 | 1.00549  |
| C                      | 4.08518  | -0.34226 | -0.97069 | O | 4.92715  | -0.52632 | 0.16936  |
| H                      | 3.08031  | 1.19404  | 1.1567   | H | 4.89833  | -1.46616 | 0.41534  |
| H                      | 3.14262  | 1.35877  | -1.89434 | O | 4.70247  | 2.02503  | -0.79793 |
| H                      | 2.34708  | -1.11043 | -1.95958 | H | 5.27578  | 1.67794  | -0.09988 |
| H                      | 4.662    | -0.51015 | -1.88946 | O | 2.01817  | 2.63696  | 0.09921  |
| H                      | 0.8859   | 0.4878   | -0.84048 | H | 2.73829  | 3.27966  | 0.05994  |
| C                      | -1.19838 | 1.78771  | 0.28087  | O | -0.71386 | 2.9856   | 0.87518  |
| C                      | -2.71943 | 1.88655  | 0.21424  | H | 0.24683  | 3.02268  | 0.71638  |
| C                      | -3.30381 | 0.61071  | -0.39104 | O | -3.11092 | 2.99024  | -0.59415 |
| C                      | -1.42493 | -0.72202 | 0.46493  | H | -2.56535 | 3.73946  | -0.31998 |
| C                      | -0.78627 | 0.54157  | 1.06779  | O | -4.68028 | 0.65198  | -0.32596 |
| H                      | -2.9498  | 0.4794   | -1.42285 | H | -5.07001 | 0.08082  | -1.02507 |
| H                      | -3.1246  | 1.9963   | 1.2291   | C | -1.19711 | -1.97098 | 1.31154  |
| H                      | -0.82965 | 1.72063  | -0.75129 | H | -1.6525  | -2.83063 | 0.80734  |
| H                      | -1.02818 | -0.91101 | -0.5415  | H | -0.12603 | -2.15035 | 1.39418  |
| H                      | -1.13958 | 0.64721  | 2.09476  | O | -1.699   | -1.83955 | 2.63995  |

|   |          |          |          |   |          |          |          |
|---|----------|----------|----------|---|----------|----------|----------|
| H | -2.64793 | -1.67406 | 2.58532  | H | 2.64007  | 2.22087  | -1.13738 |
| O | -4.24908 | -2.86032 | -0.60914 | H | 0.26786  | 1.91926  | 0.74088  |
| H | -3.78285 | -2.13483 | -0.15197 | H | 0.72941  | -0.63754 | 0.87196  |
| H | -4.66896 | -3.38088 | 0.08509  | H | 0.84748  | 0.56786  | -1.94178 |
| O | -5.66516 | -1.11554 | -2.18717 | O | -0.96673 | 0.31671  | -1.15428 |
| H | -6.62128 | -1.22145 | -2.24482 | O | -2.25662 | -1.08315 | 0.08651  |
| H | -5.32607 | -1.91039 | -1.72327 | O | 2.54009  | -0.24215 | -0.07086 |

**PC<sub>3w</sub>**

|   |          |          |          |   |          |          |          |
|---|----------|----------|----------|---|----------|----------|----------|
| C | -4.15412 | 0.99536  | 0.66899  | C | -3.42926 | -2.7852  | 1.26202  |
| C | -3.06362 | 1.14754  | -0.39699 | H | -2.4775  | -3.27121 | 1.49143  |
| C | -1.85189 | 0.27156  | -0.07206 | H | -4.12587 | -2.98426 | 2.07759  |
| C | -3.21348 | -1.28071 | 1.1375   | O | -4.01165 | -3.36112 | 0.0817   |
| C | -4.50215 | -0.47968 | 0.88395  | H | -3.33652 | -3.38177 | -0.60761 |
| H | -3.45229 | 0.83326  | -1.3714  | O | -5.22965 | -0.90121 | -0.27161 |
| H | -3.7889  | 1.41844  | 1.60881  | H | -5.1121  | -1.86118 | -0.36688 |
| H | -2.79206 | -0.93187 | 2.09189  | O | -5.29961 | 1.76906  | 0.31505  |
| H | -5.13598 | -0.57038 | 1.77559  | H | -5.78008 | 1.27174  | -0.36191 |
| H | -1.38149 | 0.61921  | 0.85686  | O | -2.60643 | 2.50212  | -0.46108 |
| C | 0.69363  | 1.90924  | -0.27117 | H | -3.37687 | 3.07485  | -0.56815 |
| C | 2.19393  | 2.15638  | -0.1359  | O | 0.15199  | 2.9905   | -1.02015 |
| C | 2.87162  | 0.99971  | 0.59944  | H | -0.81819 | 2.95232  | -0.93598 |
| C | 1.13845  | -0.56706 | -0.14561 | O | 2.43714  | 3.35616  | 0.59007  |
| C | 0.43388  | 0.55192  | -0.93203 | H | 1.85827  | 4.03105  | 0.2117   |
| H | 2.51264  | 0.93495  | 1.63599  | O | 4.23863  | 1.16094  | 0.53447  |
|   |          |          |          | H | 4.69909  | 0.62819  | 1.22215  |

|   |          |          |          |   |          |          |          |
|---|----------|----------|----------|---|----------|----------|----------|
| C | 1.00773  | -1.9445  | -0.793   | H | 4.4306   | -1.47442 | -1.90678 |
| H | 1.47713  | -2.68861 | -0.14059 | H | 1.06169  | 0.40793  | -0.7805  |
| H | -0.05281 | -2.1836  | -0.86592 | C | -0.59577 | 2.2546   | 0.18805  |
| O | 1.54683  | -2.01108 | -2.11074 | C | -2.07695 | 2.60971  | 0.18316  |
| H | 2.51105  | -2.06673 | -2.04063 | C | -2.89721 | 1.38906  | -0.2285  |
| O | 4.35433  | -2.17248 | -0.93064 | C | -1.25366 | -0.1157  | 0.7845   |
| H | 3.84096  | -1.46809 | -0.48372 | C | -0.37403 | 1.08674  | 1.15055  |
| H | 4.18253  | -2.97903 | -0.42906 | H | -3.9661  | 1.58359  | -0.10971 |
| O | 5.78186  | -0.36181 | 2.18848  | H | -2.37822 | 2.87411  | 1.20456  |
| H | 6.39716  | 0.08553  | 2.77971  | H | -0.31298 | 1.97344  | -0.83122 |
| H | 6.11503  | -1.83037 | -0.45678 | H | -0.96267 | -0.52609 | -0.187   |
| O | 6.94003  | -1.65978 | 0.04279  | H | -0.63819 | 1.41543  | 2.15634  |
| H | 7.51272  | -1.1619  | -0.55118 | O | 1.01161  | 0.74086  | 1.26183  |
| H | 6.32921  | -0.80984 | 1.50591  | O | 1.92183  | -1.10663 | 0.31802  |

## 2. HAc-catalyzed Mechanism

### RC<sub>HAc</sub>

|   |         |          |          |   |         |          |          |
|---|---------|----------|----------|---|---------|----------|----------|
| C | 3.8107  | 0.45399  | -1.17766 | H | 1.6975  | -3.6125  | -0.37933 |
| C | 2.98353 | 1.03701  | -0.03128 | H | 3.24482 | -3.72126 | -1.24112 |
| C | 1.67078 | 0.27663  | 0.12266  | O | 3.43115 | -3.45351 | 0.76758  |
| C | 2.62991 | -1.71577 | -0.7687  | H | 2.89532 | -3.12845 | 1.50195  |
| C | 3.99672 | -1.05171 | -0.99208 | O | 4.90554 | -1.21913 | 0.09692  |
| H | 3.53781 | 0.94801  | 0.90846  | H | 4.71112 | -2.0711  | 0.52222  |
| H | 3.28803 | 0.64024  | -2.11956 | O | 5.05802 | 1.13702  | -1.28043 |
| H | 2.05184 | -1.60335 | -1.69701 | H | 5.62424 | 0.7947   | -0.57441 |

|                           |          |          |          |   |          |          |          |
|---------------------------|----------|----------|----------|---|----------|----------|----------|
| O                         | 2.65663  | 2.4051   | -0.28799 | C | -1.94137 | 0.18937  | -0.19546 |
| H                         | 3.47357  | 2.86813  | -0.51374 | C | -2.94729 | -1.59641 | 1.02168  |
| O                         | 0.13128  | 3.41024  | 0.58308  | C | -4.36048 | -1.01614 | 0.86033  |
| H                         | 1.06723  | 3.24228  | 0.37225  | H | -3.67641 | 0.48095  | -1.40317 |
| O                         | -2.35844 | 3.68434  | -0.69926 | H | -3.92729 | 0.95768  | 1.60293  |
| H                         | -1.69457 | 4.36404  | -0.52376 | H | -2.53583 | -1.20999 | 1.96512  |
| O                         | -2.57954 | 1.00472  | -1.52434 | H | -4.92027 | -1.23301 | 1.77872  |
| H                         | -3.20611 | 0.29429  | -1.77311 | H | -1.50381 | 0.58909  | 0.72781  |
| C                         | -1.2035  | -1.23026 | 1.81804  | C | 0.22009  | 2.26608  | -0.39822 |
| H                         | -1.83649 | -2.05883 | 1.48229  | C | 1.65726  | 2.74845  | -0.24318 |
| H                         | -0.17787 | -1.58894 | 1.89017  | C | 2.46841  | 1.72775  | 0.55469  |
| O                         | -1.5858  | -0.79518 | 3.12056  | C | 1.07865  | -0.10335 | -0.27537 |
| H                         | -2.4922  | -0.46867 | 3.07244  | C | 0.21626  | 0.8884   | -1.06611 |
| C                         | -4.79369 | -1.80023 | -0.96725 | H | 3.53168  | 1.98065  | 0.53599  |
| O                         | -4.40046 | -1.04861 | -1.84821 | H | 2.11245  | 2.8137   | -1.23942 |
| O                         | -4.41887 | -1.6889  | 0.3051   | H | -0.22137 | 2.20505  | 0.60182  |
| H                         | -3.77494 | -0.9429  | 0.42374  | H | 0.66804  | -0.25553 | 0.7276   |
| C                         | -5.7424  | -2.93818 | -1.19769 | H | 0.63429  | 0.98438  | -2.06897 |
| H                         | -5.25848 | -3.87675 | -0.91806 | O | -1.11706 | 0.41534  | -1.29823 |
| H                         | -6.62039 | -2.81926 | -0.55938 | O | -2.09678 | -1.21612 | -0.06675 |
| H                         | -6.04134 | -2.97155 | -2.24231 | O | 2.4018   | 0.46596  | -0.14604 |
| <b>RC<sub>HAc+w</sub></b> |          |          |          | C | -2.90511 | -3.11676 | 1.08625  |
| C                         | -4.27525 | 0.49847  | 0.67396  | H | -1.88007 | -3.44403 | 1.27747  |
| C                         | -3.29371 | 0.84792  | -0.44553 | H | -3.54202 | -3.46691 | 1.89886  |









|   |          |          |          |   |          |          |          |
|---|----------|----------|----------|---|----------|----------|----------|
| C | 1.56211  | 0.3406   | 0.103    | O | 3.63293  | -3.20341 | 0.9119   |
| C | 2.56786  | -1.67293 | -0.6848  | H | 3.15508  | -2.84173 | 1.66868  |
| C | 3.85924  | -0.95938 | -1.1113  | O | 4.88045  | -0.96659 | -0.11289 |
| H | 3.44467  | 1.19353  | 0.63377  | H | 4.78721  | -1.78297 | 0.40611  |
| H | 2.93644  | 0.57038  | -2.31249 | O | 4.74051  | 1.24768  | -1.70251 |
| H | 1.89445  | -1.68725 | -1.55362 | H | 5.39374  | 1.00344  | -1.03164 |
| H | 4.22731  | -1.44508 | -2.02372 | O | 2.36493  | 2.4682   | -0.60688 |
| H | 0.86763  | 0.33663  | -0.74666 | H | 3.12548  | 2.95753  | -0.94564 |
| C | -0.82737 | 2.15332  | 0.22089  | O | -0.06957 | 3.33761  | 0.45849  |
| C | -2.29677 | 2.59245  | 0.27714  | H | 0.84059  | 3.17688  | 0.14589  |
| C | -3.22941 | 1.58129  | -0.37772 | O | -2.47128 | 3.79948  | -0.46553 |
| C | -1.20345 | -0.24808 | 1.13895  | H | -1.6433  | 4.29099  | -0.34368 |
| C | -0.44882 | 1.0824   | 1.25955  | O | -2.93448 | 0.99694  | -1.40792 |
| H | -4.23532 | 1.49128  | 0.05467  | H | -3.8272  | -0.36399 | -1.82388 |
| H | -2.60722 | 2.74328  | 1.31613  | C | -0.7777  | -1.27475 | 2.18849  |
| H | -0.6298  | 1.7898   | -0.79242 | H | -1.30767 | -2.21346 | 1.98489  |
| H | -1.05281 | -0.67985 | 0.14284  | H | 0.29205  | -1.45859 | 2.12574  |
| H | -0.63971 | 1.4957   | 2.2511   | O | -1.05583 | -0.81925 | 3.51151  |
| O | 0.97618  | 0.88605  | 1.24665  | H | -1.98449 | -0.55362 | 3.52692  |
| O | 1.93292  | -0.99625 | 0.40641  | C | -4.43983 | -2.05855 | -1.12456 |
| O | -2.59289 | 0.05448  | 1.33247  | O | -4.31611 | -1.18252 | -2.11392 |
| C | 2.77295  | -3.11262 | -0.23445 | O | -4.01255 | -1.86615 | 0.00637  |
| H | 1.80296  | -3.56719 | -0.01812 | H | -3.12138 | -0.65458 | 0.90722  |
| H | 3.25614  | -3.68013 | -1.03015 | C | -5.15883 | -3.30878 | -1.53809 |

|                             |          |          |          |   |          |          |          |
|-----------------------------|----------|----------|----------|---|----------|----------|----------|
| H                           | -4.61081 | -3.79276 | -2.34959 | O | -1.01471 | 1.09742  | -1.26907 |
| H                           | -5.24805 | -3.98749 | -0.69359 | O | -1.93098 | -0.81761 | -0.45479 |
| H                           | -6.14965 | -3.05263 | -1.9193  | O | 2.53718  | 0.20241  | -1.40359 |
| <b>IM1</b> <sub>HAc+w</sub> |          |          |          | C | -2.72661 | -2.95809 | 0.16191  |
| C                           | -3.52526 | 0.62684  | 1.44024  | H | -1.75623 | -3.39507 | -0.08691 |
| C                           | -2.80606 | 1.30972  | 0.2757   | H | -3.18331 | -3.54869 | 0.95646  |
| C                           | -1.56879 | 0.516    | -0.12816 | O | -3.61231 | -3.03596 | -0.9656  |
| C                           | -2.52879 | -1.52554 | 0.6374   | H | -3.1572  | -2.65148 | -1.72519 |
| C                           | -3.81743 | -0.83711 | 1.11082  | O | -4.86169 | -0.83486 | 0.13646  |
| H                           | -3.47083 | 1.36703  | -0.59189 | H | -4.77185 | -1.63922 | -0.40152 |
| H                           | -2.88431 | 0.6771   | 2.32432  | O | -4.71094 | 1.3444   | 1.7742   |
| H                           | -1.83325 | -1.54921 | 1.48852  | H | -5.37689 | 1.10862  | 1.11296  |
| H                           | -4.15807 | -1.34723 | 2.02048  | O | -2.36596 | 2.61681  | 0.65261  |
| H                           | -0.85588 | 0.49888  | 0.70606  | H | -3.12082 | 3.09654  | 1.0166   |
| C                           | 0.83135  | 2.31278  | -0.25819 | O | 0.06649  | 3.50347  | -0.44032 |
| C                           | 2.30342  | 2.74667  | -0.35344 | H | -0.83552 | 3.33505  | -0.10914 |
| C                           | 3.24351  | 1.76593  | 0.34412  | O | 2.49078  | 3.98534  | 0.33319  |
| C                           | 1.13846  | -0.0726  | -1.25282 | H | 1.64111  | 4.44834  | 0.25185  |
| C                           | 0.41234  | 1.27587  | -1.31507 | O | 2.97182  | 1.26795  | 1.42073  |
| H                           | 4.23267  | 1.62309  | -0.11315 | H | 4.02367  | 0.11605  | 2.25117  |
| H                           | 2.60348  | 2.85247  | -1.40049 | C | 0.69967  | -1.02886 | -2.36282 |
| H                           | 0.66516  | 1.92381  | 0.7512   | H | 1.20011  | -1.99194 | -2.20728 |
| H                           | 0.95651  | -0.55225 | -0.28435 | H | -0.37553 | -1.18594 | -2.32286 |
| H                           | 0.58308  | 1.71565  | -2.29881 | O | 1.00794  | -0.50962 | -3.65547 |

|   |         |          |          |   |          |          |          |
|---|---------|----------|----------|---|----------|----------|----------|
| H | 1.94331 | -0.26836 | -3.6451  | C | -2.23425 | 2.41407  | 0.3241   |
| O | 4.53366 | -0.61554 | 2.66491  | C | -3.18077 | 1.47109  | -0.39561 |
| H | 3.85406 | -2.02102 | 2.17169  | C | -1.00772 | -0.49891 | 0.92164  |
| H | 4.53161 | -0.44137 | 3.61303  | C | -0.33519 | 0.85419  | 1.18743  |
| C | 3.18509 | -2.83354 | 0.56696  | H | -2.76417 | 0.93429  | -1.26263 |
| O | 3.37252 | -2.8526  | 1.87714  | H | -2.54523 | 2.50862  | 1.36979  |
| O | 3.63912 | -1.94981 | -0.1501  | H | -0.55755 | 1.6994   | -0.80881 |
| H | 3.02286 | -0.57424 | -1.0618  | H | -0.72888 | -0.86647 | -0.07329 |
| C | 2.35105 | -3.97566 | 0.06299  | H | -0.57618 | 1.16365  | 2.20448  |
| H | 2.60753 | -4.90028 | 0.58026  | O | 1.09854  | 0.74123  | 1.20107  |
| H | 1.30035 | -3.75586 | 0.27469  | O | 2.15664  | -1.03216 | 0.25051  |
| H | 2.479   | -4.08945 | -1.01119 | C | 3.11139  | -3.05618 | -0.51303 |

### IM2<sub>HAc</sub>

|   |          |          |          |   |          |          |          |
|---|----------|----------|----------|---|----------|----------|----------|
| C | 3.79971  | 0.67231  | -1.365   | H | 2.1521   | -3.5638  | -0.38521 |
| C | 2.96469  | 1.19624  | -0.19564 | H | 3.65788  | -3.53853 | -1.32376 |
| C | 1.74569  | 0.31066  | 0.04132  | O | 3.91569  | -3.2056  | 0.66722  |
| C | 2.86856  | -1.59357 | -0.85865 | H | 3.38629  | -2.92106 | 1.42271  |
| C | 4.14857  | -0.80107 | -1.16046 | O | 5.11779  | -0.84867 | -0.11256 |
| H | 3.56463  | 1.19556  | 0.7197   | H | 5.03301  | -1.70681 | 0.33572  |
| H | 3.22205  | 0.78213  | -2.28629 | O | 4.96403  | 1.4776   | -1.53355 |
| H | 2.23867  | -1.56173 | -1.75909 | H | 5.59336  | 1.20662  | -0.85027 |
| H | 4.58184  | -1.19921 | -2.08643 | O | 2.48441  | 2.51338  | -0.47429 |
| H | 1.08266  | 0.35264  | -0.83251 | H | 3.23742  | 3.06553  | -0.7205  |
| C | -0.75783 | 1.98833  | 0.23142  | O | -0.02154 | 3.16935  | 0.54027  |
|   |          |          |          | H | 0.9014   | 3.0455   | 0.24676  |

|                            |          |          |          |   |          |          |          |
|----------------------------|----------|----------|----------|---|----------|----------|----------|
| O                          | -2.40371 | 3.65833  | -0.36052 | H | -3.80926 | -1.14248 | 0.6604   |
| H                          | -1.56046 | 4.12595  | -0.24511 | H | -3.41555 | -0.49397 | -2.29761 |
| O                          | -4.37809 | 1.43724  | -0.16015 | H | -2.1841  | 1.67313  | -1.56983 |
| C                          | -0.60599 | -1.56951 | 1.92775  | H | -4.55237 | 1.59576  | -1.91148 |
| H                          | -1.18921 | -2.47379 | 1.71627  | H | -1.25546 | -0.43248 | -0.83857 |
| H                          | 0.4536   | -1.7964  | 1.79471  | C | 0.46915  | -2.2888  | 0.08074  |
| O                          | -0.87    | -1.09837 | 3.2521   | C | 1.88617  | -2.87729 | 0.21328  |
| H                          | -0.53274 | -1.74994 | 3.87484  | C | 2.97926  | -2.03456 | -0.42055 |
| O                          | -2.40989 | -0.23903 | 0.96782  | C | 0.85799  | 0.12581  | 0.94155  |
| H                          | -5.17782 | 0.11592  | -0.81965 | C | 0.12055  | -1.20444 | 1.12108  |
| C                          | -5.07003 | -1.80551 | -1.0608  | H | 2.69165  | -1.45428 | -1.31176 |
| O                          | -5.6889  | -0.64184 | -1.22077 | H | 2.13136  | -3.05304 | 1.26635  |
| O                          | -3.99954 | -1.93    | -0.48075 | H | 0.35556  | -1.89017 | -0.93588 |
| H                          | -2.91209 | -0.9345  | 0.49512  | H | 0.54237  | 0.60455  | 0.00946  |
| C                          | -5.82027 | -2.9524  | -1.67272 | H | 0.34241  | -1.60335 | 2.11216  |
| H                          | -5.92704 | -2.78531 | -2.74695 | O | -1.3033  | -1.00012 | 1.1517   |
| H                          | -5.29147 | -3.88523 | -1.4936  | O | -2.16391 | 0.95798  | 0.38181  |
| H                          | -6.82491 | -3.00317 | -1.24783 | O | 2.25389  | -0.18085 | 0.87829  |
| <b>IM2<sub>HAc+w</sub></b> |          |          |          | C | -2.89222 | 3.13508  | -0.19022 |
| C                          | -3.98125 | -0.40674 | -1.36636 | H | -1.88373 | 3.52126  | -0.02287 |
| C                          | -3.21064 | -1.12247 | -0.25564 | H | -3.37852 | 3.74409  | -0.95266 |
| C                          | -1.905   | -0.39685 | 0.04641  | O | -3.68116 | 3.26736  | 1.0024   |
| C                          | -2.80937 | 1.69126  | -0.66586 | H | -3.18741 | 2.86682  | 1.72879  |
| C                          | -4.16728 | 1.07187  | -1.02774 | O | -5.12785 | 1.13156  | 0.02748  |

|   |          |          |          |
|---|----------|----------|----------|
| H | -4.95005 | 1.93226  | 0.54897  |
| O | -5.22617 | -1.06058 | -1.599   |
| H | -5.82386 | -0.78488 | -0.88972 |
| O | -2.8666  | -2.45083 | -0.65569 |
| H | -3.67188 | -2.90429 | -0.93534 |
| O | -0.39773 | -3.40813 | 0.25059  |
| H | -1.29996 | -3.15916 | -0.02659 |
| O | 1.95604  | -4.1027  | -0.52255 |
| H | 1.05623  | -4.46733 | -0.49109 |
| O | 4.14524  | -2.12796 | -0.08319 |
| H | 5.25336  | -0.95806 | -0.76727 |
| C | 0.61203  | 1.09653  | 2.09659  |
| H | 1.07747  | 2.05722  | 1.84574  |
| H | -0.45555 | 1.25257  | 2.23724  |
| O | 1.1362   | 0.59058  | 3.32357  |
| H | 2.05077  | 0.33209  | 3.14892  |
| O | 5.84125  | -0.24119 | -1.09693 |
| H | 5.36137  | 1.32886  | -1.02598 |
| H | 6.15748  | -0.52837 | -1.96078 |
| C | 4.02901  | 2.72603  | -0.81133 |
| O | 5.26619  | 2.32678  | -1.05665 |
| O | 3.11584  | 1.9606   | -0.52894 |
| H | 2.70105  | 0.54455  | 0.39495  |
| C | 3.85738  | 4.2138   | -0.91976 |

|   |         |         |          |
|---|---------|---------|----------|
| H | 4.54475 | 4.71281 | -0.23324 |
| H | 4.11158 | 4.53876 | -1.93118 |
| H | 2.83227 | 4.49174 | -0.68737 |

### TS<sub>2HAc</sub>

|   |          |          |          |
|---|----------|----------|----------|
| C | 3.88293  | 0.69534  | -1.20906 |
| C | 2.99806  | 1.18403  | -0.06129 |
| C | 1.75308  | 0.31382  | 0.0647   |
| C | 2.87832  | -1.57143 | -0.86339 |
| C | 4.18909  | -0.79384 | -1.05282 |
| H | 3.54834  | 1.12745  | 0.88301  |
| H | 3.35637  | 0.85856  | -2.15293 |
| H | 2.30187  | -1.48169 | -1.79504 |
| H | 4.66744  | -1.15951 | -1.96985 |
| H | 1.14084  | 0.41911  | -0.83994 |
| C | -0.71674 | 2.04118  | 0.18397  |
| C | -2.20796 | 2.38059  | 0.21883  |
| C | -3.05606 | 1.25981  | -0.34553 |
| C | -1.08271 | -0.42084 | 0.73517  |
| C | -0.36375 | 0.87569  | 1.11776  |
| H | -2.69703 | 0.8286   | -1.28601 |
| H | -2.52449 | 2.57252  | 1.25076  |
| H | -0.45578 | 1.78927  | -0.85188 |
| H | -0.778   | -0.76561 | -0.25873 |
| H | -0.65838 | 1.14597  | 2.13225  |







|   |          |          |          |   |          |          |          |
|---|----------|----------|----------|---|----------|----------|----------|
| H | 3.60863  | 0.94973  | 0.97551  | O | 5.20908  | 1.27763  | -1.1401  |
| H | 3.48554  | 0.7821   | -2.07113 | H | 5.75633  | 0.91478  | -0.4294  |
| H | 2.28891  | -1.50372 | -1.80781 | O | 2.74027  | 2.44142  | -0.18722 |
| H | 4.67025  | -1.31403 | -1.91372 | H | 3.55274  | 2.93386  | -0.36082 |
| H | 1.21688  | 0.43599  | -0.83817 | O | 0.15873  | 3.33461  | 0.59618  |
| C | -0.53824 | 2.18006  | 0.15267  | H | 1.10525  | 3.18658  | 0.41705  |
| C | -2.0213  | 2.52386  | 0.10028  | O | -2.25569 | 3.57893  | -0.82235 |
| C | -2.82051 | 1.30554  | -0.34665 | H | -1.57786 | 4.24643  | -0.65192 |
| C | -1.15162 | -0.21935 | 0.60958  | O | -4.16928 | 1.56959  | -0.2596  |
| C | -0.3137  | 0.98009  | 1.07091  | C | -1.08227 | -1.39858 | 1.56979  |
| H | -2.52559 | 1.00218  | -1.36062 | H | -1.6885  | -2.22038 | 1.17436  |
| H | -2.36656 | 2.80708  | 1.10299  | H | -0.04806 | -1.73333 | 1.63166  |
| H | -0.22225 | 1.9362   | -0.8697  | O | -1.49013 | -1.05587 | 2.89156  |
| H | -0.83121 | -0.56005 | -0.38305 | H | -2.40429 | -0.75021 | 2.85378  |
| H | -0.62447 | 1.24844  | 2.08094  | O | -2.53537 | 0.19174  | 0.54665  |
| O | 1.07676  | 0.67014  | 1.21474  | H | -4.65122 | 0.85132  | -0.72186 |
| O | 2.06732  | -1.11018 | 0.22195  | C | -5.09671 | -1.7536  | -0.87871 |
| C | 2.93313  | -3.14783 | -0.61186 | O | -5.31127 | -0.65642 | -1.37569 |
| H | 1.93094  | -3.58362 | -0.60489 | O | -4.1375  | -1.96662 | 0.01879  |
| H | 3.51274  | -3.61499 | -1.40842 | H | -3.62378 | -1.13783 | 0.1977   |
| O | 3.61457  | -3.44398 | 0.61687  | C | -5.8752  | -2.99112 | -1.20811 |
| H | 3.0423   | -3.17031 | 1.34464  | H | -5.19867 | -3.75917 | -1.58892 |
| O | 5.05878  | -1.14607 | 0.11787  | H | -6.33775 | -3.38287 | -0.29945 |
| H | 4.87039  | -2.02335 | 0.49125  | H | -6.63978 | -2.76684 | -1.94753 |

**PC<sub>HAc+w</sub>**

|   |          |          |          |   |          |          |          |
|---|----------|----------|----------|---|----------|----------|----------|
| C | -4.41001 | 0.62808  | 0.59879  | C | -3.10386 | -2.9621  | 1.329    |
| C | -3.37295 | 0.8895   | -0.49462 | H | -2.09077 | -3.28377 | 1.58288  |
| C | -2.04319 | 0.23497  | -0.13792 | H | -3.7749  | -3.24668 | 2.1398   |
| C | -3.12478 | -1.44993 | 1.15339  | O | -3.56607 | -3.65023 | 0.15632  |
| C | -4.52161 | -0.86917 | 0.88623  | H | -2.89834 | -3.54177 | -0.53236 |
| H | -3.71714 | 0.46204  | -1.44187 | O | -5.18162 | -1.45162 | -0.23854 |
| H | -4.10109 | 1.14813  | 1.50935  | H | -4.8893  | -2.37566 | -0.31181 |
| H | -2.74941 | -1.00113 | 2.08437  | O | -5.66581 | 1.19416  | 0.23113  |
| H | -5.12649 | -1.01631 | 1.78962  | H | -6.06422 | 0.59524  | -0.41607 |
| H | -1.64256 | 0.69304  | 0.77531  | O | -3.12888 | 2.29     | -0.64018 |
| C | 0.18931  | 2.2412   | -0.38007 | H | -3.98063 | 2.73134  | -0.75094 |
| C | 1.62596  | 2.68329  | -0.15152 | O | -0.4572  | 3.14549  | -1.26084 |
| C | 2.36745  | 1.64194  | 0.68785  | H | -1.40901 | 2.94556  | -1.22118 |
| C | 0.96803  | -0.16606 | -0.08627 | O | 1.62191  | 3.93322  | 0.52635  |
| C | 0.17097  | 0.8156   | -0.9547  | H | 2.54257  | 4.15739  | 0.71198  |
| H | 1.8978   | 1.54245  | 1.67633  | O | 3.6916   | 2.01804  | 0.78614  |
| H | 2.14099  | 2.76825  | -1.11695 | H | 4.1084   | 1.52     | 1.52854  |
| H | -0.3138  | 2.25693  | 0.59547  | C | 1.04508  | -1.57159 | -0.66985 |
| H | 0.52773  | -0.2462  | 0.91608  | H | 1.65597  | -2.19354 | -0.00728 |
| H | 0.63129  | 0.83751  | -1.94284 | H | 0.03563  | -1.97979 | -0.68643 |
| O | -1.16911 | 0.38022  | -1.21536 | O | 1.53747  | -1.6116  | -2.0061  |
| O | -2.22272 | -1.15634 | 0.07986  | H | 2.49955  | -1.5235  | -1.97869 |
| O | 2.3047   | 0.35573  | 0.04071  | O | 4.79615  | 0.40617  | 2.6439   |
|   |          |          |          | H | 4.89209  | -0.40907 | 2.1115   |

|   |         |          |          |   |          |          |          |
|---|---------|----------|----------|---|----------|----------|----------|
| H | 4.26389 | 0.16558  | 3.41035  | C | -0.53752 | 0.36271  | 0.86025  |
| C | 5.06868 | -1.8471  | -0.29747 | C | 0.57883  | 1.379    | 1.13348  |
| O | 5.18012 | -1.72261 | 0.9101   | H | -2.88146 | 2.54421  | -0.06425 |
| O | 4.26853 | -1.07137 | -1.03657 | H | -1.01872 | 3.5408   | 1.14051  |
| H | 3.72637 | -0.45632 | -0.47884 | H | 0.74371  | 2.13619  | -0.89544 |
| C | 5.79035 | -2.87539 | -1.11386 | H | -0.37765 | -0.14479 | -0.09514 |
| H | 6.30126 | -2.39525 | -1.95039 | H | 0.42437  | 1.80304  | 2.12619  |
| H | 6.50302 | -3.41304 | -0.49366 | O | 1.86693  | 0.76143  | 1.22661  |
| H | 5.06203 | -3.5751  | -1.53173 | O | 2.34605  | -1.27223 | 0.35035  |

## 1. TFA-catalyzed Mechanism

### RC<sub>TFA</sub>

|   |          |          |          |   |          |          |          |
|---|----------|----------|----------|---|----------|----------|----------|
| C | 4.46107  | -0.19864 | -1.26698 | H | 1.58727  | -3.7027  | -0.21316 |
| C | 3.81253  | 0.58938  | -0.12806 | H | 3.0402   | -4.16652 | -1.11985 |
| C | 2.37817  | 0.12305  | 0.09489  | O | 3.36333  | -3.86403 | 0.86648  |
| C | 2.87424  | -2.05968 | -0.72445 | H | 2.93589  | -3.40932 | 1.60299  |
| C | 4.33917  | -1.7017  | -1.01677 | O | 5.23392  | -2.00986 | 0.05292  |
| H | 4.36937  | 0.42731  | 0.80029  | H | 4.88649  | -2.78829 | 0.51978  |
| H | 3.95528  | 0.05473  | -2.20234 | O | 5.81802  | 0.20542  | -1.43391 |
| H | 2.29771  | -1.86995 | -1.64102 | H | 6.32591  | -0.21956 | -0.72838 |
| H | 4.64269  | -2.24117 | -1.92262 | O | 3.76318  | 1.98359  | -0.44146 |
| H | 1.77896  | 0.34032  | -0.79811 | H | 4.64805  | 2.25902  | -0.71319 |
| C | 0.56295  | 2.51893  | 0.11389  | O | 1.52262  | 3.51866  | 0.42537  |
| C | -0.81383 | 3.17057  | 0.12832  | H | 2.39746  | 3.15319  | 0.20142  |
| C | -1.88043 | 2.12821  | -0.19634 | O | -0.90452 | 4.23219  | -0.80703 |

|                           |          |          |          |   |          |          |          |
|---------------------------|----------|----------|----------|---|----------|----------|----------|
| H                         | -0.11064 | 4.77026  | -0.68943 | H | 3.1247   | -1.27915 | -1.99864 |
| O                         | -1.68873 | 1.62395  | -1.47556 | H | 5.47595  | -1.61783 | -1.7224  |
| H                         | -2.47074 | 1.09042  | -1.70101 | H | 2.26167  | 0.56143  | -0.68853 |
| C                         | -0.66912 | -0.68627 | 1.95376  | C | 0.72134  | 2.37743  | 0.48291  |
| H                         | -1.483   | -1.37391 | 1.69943  | C | -0.63515 | 3.04861  | 0.30283  |
| H                         | 0.25843  | -1.25557 | 1.99061  | C | -1.52324 | 2.19236  | -0.599   |
| O                         | -0.86236 | -0.12315 | 3.24796  | C | -0.42136 | 0.14258  | 0.18632  |
| H                         | -1.69556 | 0.36225  | 3.24894  | C | 0.52341  | 0.97431  | 1.06283  |
| C                         | -4.42799 | -0.52219 | -0.5102  | H | -2.54582 | 2.57708  | -0.61646 |
| O                         | -4.03801 | 0.02145  | -1.51721 | H | -1.12951 | 3.10989  | 1.28035  |
| O                         | -3.94134 | -0.43243 | 0.69819  | H | 1.19731  | 2.31921  | -0.50118 |
| H                         | -3.11785 | 0.15467  | 0.72733  | H | 0.00807  | -0.01256 | -0.80749 |
| C                         | -5.65146 | -1.47663 | -0.53854 | H | 0.07982  | 1.06593  | 2.05486  |
| F                         | -6.20356 | -1.51075 | -1.7538  | O | 1.77406  | 0.32007  | 1.30871  |
| F                         | -5.27542 | -2.72773 | -0.21113 | O | 2.59523  | -1.34667 | 0.01098  |
| F                         | -6.58982 | -1.08229 | 0.3405   | O | -1.6542  | 0.89049  | 0.03321  |
| <b>RC<sub>TFA+w</sub></b> |          |          |          | C | 3.2147   | -3.26508 | -1.22911 |
| C                         | 4.99817  | 0.12017  | -0.54548 | H | 2.16601  | -3.44986 | -1.47479 |
| C                         | 4.02051  | 0.52754  | 0.55769  | H | 3.8364   | -3.64226 | -2.04151 |
| C                         | 2.6094   | 0.057    | 0.22163  | O | 3.58869  | -4.0001  | -0.05368 |
| C                         | 3.44075  | -1.76857 | -1.06627 | H | 2.94816  | -3.7953  | 0.63887  |
| C                         | 4.90572  | -1.38106 | -0.81548 | O | 5.49212  | -2.03512 | 0.31041  |
| H                         | 4.31508  | 0.06443  | 1.50472  | H | 5.08147  | -2.91181 | 0.39516  |
| H                         | 4.74661  | 0.66671  | -1.45826 | O | 6.32249  | 0.52051  | -0.20122 |

|   |          |          |          |
|---|----------|----------|----------|
| H | 6.64801  | -0.11662 | 0.45021  |
| O | 3.97572  | 1.95023  | 0.69274  |
| H | 4.8836   | 2.27015  | 0.77137  |
| O | 1.50116  | 3.19851  | 1.34173  |
| H | 2.42343  | 2.89411  | 1.26652  |
| O | -0.50594 | 4.34503  | -0.25853 |
| H | 0.19383  | 4.78969  | 0.23764  |
| O | -0.982   | 2.08371  | -1.86403 |
| H | -1.66585 | 1.69466  | -2.45603 |
| C | -0.75087 | -1.22328 | 0.77192  |
| H | -1.43409 | -1.74895 | 0.09782  |
| H | 0.17849  | -1.78967 | 0.81961  |
| O | -1.27695 | -1.16872 | 2.09628  |
| H | -2.22039 | -0.97586 | 2.05185  |
| O | -3.01121 | 0.98082  | -3.30208 |
| H | -3.55547 | 0.45548  | -2.68919 |
| H | -2.77979 | 0.38564  | -4.024   |
| C | -4.69913 | -0.57411 | -0.23095 |
| O | -4.62891 | -0.41902 | -1.42594 |
| O | -3.86601 | -0.17369 | 0.69206  |
| H | -3.04058 | 0.29042  | 0.31803  |
| C | -5.89232 | -1.33465 | 0.40842  |
| F | -6.54853 | -0.5457  | 1.27888  |
| F | -5.4563  | -2.4182  | 1.07822  |

|                          |          |          |          |
|--------------------------|----------|----------|----------|
| F                        | -6.75768 | -1.73977 | -0.52413 |
| <b>TS1<sub>TFA</sub></b> |          |          |          |
| C                        | 4.19248  | -0.22507 | -1.55375 |
| C                        | 3.65153  | 0.66621  | -0.43453 |
| C                        | 2.28878  | 0.17199  | 0.03782  |
| C                        | 2.7921   | -2.06756 | -0.60197 |
| C                        | 4.18759  | -1.69024 | -1.12021 |
| H                        | 4.33339  | 0.64356  | 0.42127  |
| H                        | 3.5574   | -0.10757 | -2.43563 |
| H                        | 2.09438  | -1.99933 | -1.44862 |
| H                        | 4.40665  | -2.32218 | -1.98986 |
| H                        | 1.56092  | 0.2612   | -0.7788  |
| C                        | 0.35337  | 2.46721  | 0.08452  |
| C                        | -0.99743 | 3.18134  | 0.20416  |
| C                        | -2.15205 | 2.25539  | -0.12019 |
| C                        | -0.47235 | 0.32074  | 1.22586  |
| C                        | 0.57375  | 1.43999  | 1.20484  |
| H                        | -3.11379 | 2.45819  | 0.35183  |
| H                        | -1.12942 | 3.55601  | 1.22437  |
| H                        | 0.39045  | 1.98068  | -0.89544 |
| H                        | -0.46458 | -0.23759 | 0.28362  |
| H                        | 0.53603  | 1.96473  | 2.16025  |
| O                        | 1.90646  | 0.92024  | 1.15518  |
| O                        | 2.36863  | -1.18414 | 0.44449  |

|   |          |          |          |
|---|----------|----------|----------|
| O | -1.7531  | 0.9802   | 1.3766   |
| C | 2.69902  | -3.47817 | -0.03783 |
| H | 1.66477  | -3.68823 | 0.24602  |
| H | 3.00591  | -4.19651 | -0.79855 |
| O | 3.57363  | -3.67258 | 1.08413  |
| H | 3.2204   | -3.16636 | 1.8263   |
| O | 5.22136  | -1.82904 | -0.14517 |
| H | 4.98585  | -2.5707  | 0.43687  |
| O | 5.49186  | 0.21195  | -1.94384 |
| H | 6.10942  | -0.10774 | -1.27096 |
| O | 3.47831  | 2.00822  | -0.89676 |
| H | 4.30896  | 2.29929  | -1.29426 |
| O | 1.33428  | 3.49281  | 0.1462   |
| H | 2.17361  | 3.11919  | -0.18352 |
| O | -1.07871 | 4.24899  | -0.73026 |
| H | -0.19252 | 4.64128  | -0.75252 |
| O | -2.11175 | 1.57618  | -1.18138 |
| H | -3.04459 | 0.91997  | -1.31876 |
| C | -0.29038 | -0.66195 | 2.37894  |
| H | -1.07966 | -1.42037 | 2.32033  |
| H | 0.67223  | -1.15751 | 2.26822  |
| O | -0.29098 | -0.02127 | 3.64986  |
| H | -1.14876 | 0.40244  | 3.77342  |
| C | -4.27693 | -0.6052  | -0.43457 |

|   |          |          |          |
|---|----------|----------|----------|
| O | -4.03896 | 0.14169  | -1.43145 |
| O | -3.73148 | -0.63717 | 0.67008  |
| H | -2.48129 | 0.3259   | 1.18755  |
| C | -5.42484 | -1.62106 | -0.70484 |
| F | -6.52329 | -1.00276 | -1.18198 |
| F | -5.03646 | -2.52957 | -1.62728 |
| F | -5.78136 | -2.29086 | 0.39992  |

**TS1<sub>TFA+w</sub>**

|   |          |          |          |
|---|----------|----------|----------|
| C | 4.39859  | -0.54273 | -1.17128 |
| C | 3.83312  | 0.23766  | 0.01633  |
| C | 2.33464  | -0.00692 | 0.15528  |
| C | 2.50934  | -2.15649 | -0.85596 |
| C | 4.02417  | -2.02142 | -1.06998 |
| H | 4.31629  | -0.09187 | 0.9415   |
| H | 3.98493  | -0.12797 | -2.09409 |
| H | 2.01083  | -1.78729 | -1.7637  |
| H | 4.27706  | -2.51997 | -2.01402 |
| H | 1.81415  | 0.38037  | -0.72973 |
| C | 0.91349  | 2.62206  | 0.36248  |
| C | -0.28223 | 3.5797   | 0.3668   |
| C | -1.46284 | 2.99474  | -0.3868  |
| C | -0.5329  | 0.56451  | 0.89567  |
| C | 0.69621  | 1.40133  | 1.26716  |
| H | -2.46309 | 3.32931  | -0.1074  |





|   |          |          |          |                            |          |          |          |
|---|----------|----------|----------|----------------------------|----------|----------|----------|
| H | 1.89467  | -2.10547 | -1.2961  | H                          | 5.963    | -0.3234  | -1.49073 |
| H | 4.1507   | -2.52023 | -1.97182 | O                          | 3.43354  | 1.89422  | -1.0815  |
| H | 1.46979  | 0.21218  | -0.75331 | H                          | 4.24457  | 2.12586  | -1.55192 |
| C | 0.38153  | 2.5138   | 0.03675  | O                          | 1.4201   | 3.48908  | 0.01605  |
| C | -0.92357 | 3.31588  | 0.13789  | H                          | 2.22312  | 3.06236  | -0.33831 |
| C | -2.14124 | 2.4926   | -0.25439 | O                          | -0.89723 | 4.40509  | -0.78323 |
| C | -0.44468 | 0.43788  | 1.36327  | H                          | 0.032    | 4.68373  | -0.81605 |
| C | 0.61338  | 1.53738  | 1.20396  | O                          | -2.11945 | 1.72148  | -1.20494 |
| H | -3.07964 | 2.71529  | 0.26851  | H                          | -3.3026  | 0.73846  | -1.39155 |
| H | -1.06042 | 3.68865  | 1.15795  | C                          | -0.15901 | -0.50304 | 2.53288  |
| H | 0.36668  | 1.97458  | -0.91551 | H                          | -0.92914 | -1.28415 | 2.54299  |
| H | -0.51906 | -0.15503 | 0.44465  | H                          | 0.81173  | -0.97531 | 2.40273  |
| H | 0.64356  | 2.11916  | 2.12641  | O                          | -0.13085 | 0.19122  | 3.77796  |
| O | 1.93702  | 0.98553  | 1.11075  | H                          | -0.96363 | 0.67377  | 3.85559  |
| O | 2.3137   | -1.17373 | 0.51503  | C                          | -4.26383 | -0.6501  | -0.44195 |
| O | -1.69061 | 1.11415  | 1.60683  | O                          | -4.03796 | 0.04212  | -1.5207  |
| C | 2.55865  | -3.50056 | 0.17343  | O                          | -3.74578 | -0.548   | 0.64757  |
| H | 1.53926  | -3.66567 | 0.53094  | H                          | -2.41896 | 0.50293  | 1.38905  |
| H | 2.80694  | -4.27848 | -0.54887 | C                          | -5.35311 | -1.72654 | -0.69915 |
| O | 3.49396  | -3.63374 | 1.25481  | F                          | -6.48043 | -1.16761 | -1.17502 |
| H | 3.19889  | -3.05951 | 1.97256  | F                          | -4.91973 | -2.62293 | -1.60688 |
| O | 5.10877  | -1.9533  | -0.22046 | F                          | -5.65446 | -2.38372 | 0.42402  |
| H | 4.88368  | -2.63472 | 0.43496  |                            |          |          |          |
| O | 5.3128   | -0.02315 | -2.14144 |                            |          |          |          |
|   |          |          |          | <b>IM1<sub>TFA+w</sub></b> |          |          |          |
|   |          |          |          | C                          | 3.68922  | 0.02931  | -1.48113 |

|   |          |          |          |   |          |          |          |
|---|----------|----------|----------|---|----------|----------|----------|
| C | 3.1922   | 0.97074  | -0.38275 | H | 2.39229  | -3.87946 | -0.58557 |
| C | 1.81887  | 0.53519  | 0.11538  | O | 2.99745  | -3.31061 | 1.27257  |
| C | 2.24323  | -1.73947 | -0.45735 | H | 2.66756  | -2.76912 | 2.00043  |
| C | 3.64195  | -1.42255 | -1.0064  | O | 4.68554  | -1.56896 | -0.04254 |
| H | 3.88327  | 0.95206  | 0.46575  | H | 4.42918  | -2.27805 | 0.5706   |
| H | 3.04713  | 0.14341  | -2.35848 | O | 4.99768  | 0.41031  | -1.89962 |
| H | 1.53555  | -1.67762 | -1.29633 | H | 5.61245  | 0.08798  | -1.22548 |
| H | 3.82745  | -2.08507 | -1.86098 | O | 3.05539  | 2.3033   | -0.88307 |
| H | 1.09112  | 0.61659  | -0.70248 | H | 3.89244  | 2.56091  | -1.28983 |
| C | -0.08006 | 2.86471  | 0.11555  | O | 0.95758  | 3.84141  | 0.17643  |
| C | -1.39776 | 3.65496  | 0.20786  | H | 1.7768   | 3.43169  | -0.15982 |
| C | -2.57492 | 2.89456  | -0.39795 | O | -1.30247 | 4.85539  | -0.55876 |
| C | -0.8924  | 0.69685  | 1.309    | H | -0.36087 | 5.09265  | -0.53776 |
| C | 0.119    | 1.84614  | 1.25235  | O | -2.47966 | 2.29465  | -1.45335 |
| H | -3.54704 | 3.01265  | 0.10041  | H | -3.77228 | 1.33103  | -2.05197 |
| H | -1.62438 | 3.89691  | 1.25104  | C | -0.68002 | -0.21404 | 2.51843  |
| H | -0.05522 | 2.36798  | -0.85934 | H | -1.38217 | -1.05206 | 2.44688  |
| H | -0.81611 | 0.09292  | 0.39916  | H | 0.33369  | -0.60790 | 2.51570  |
| H | 0.08613  | 2.39026  | 2.19738  | O | -0.85987 | 0.49004  | 3.74643  |
| O | 1.46222  | 1.33296  | 1.20378  | H | -1.72596 | 0.91533  | 3.70521  |
| O | 1.86314  | -0.81088 | 0.56494  | O | -4.43596 | 0.64032  | -2.2928  |
| O | -2.19946 | 1.28631  | 1.39168  | H | -3.87038 | -0.71256 | -1.98355 |
| C | 2.11527  | -3.12764 | 0.15394  | H | -4.67354 | 0.78874  | -3.21573 |
| H | 1.07952  | -3.29757 | 0.45531  | C | -3.18672 | -1.78301 | -0.51462 |

|                          |          |          |          |   |          |          |          |
|--------------------------|----------|----------|----------|---|----------|----------|----------|
| O                        | -3.43589 | -1.62964 | -1.77864 | H | -1.22644 | 3.25070  | 1.30364  |
| O                        | -3.44788 | -1.03564 | 0.40236  | H | 0.35041  | 1.83569  | -0.90363 |
| H                        | -2.83839 | 0.60364  | 1.12684  | H | -0.08757 | -0.56300 | 0.18853  |
| C                        | -2.43537 | -3.11851 | -0.2562  | H | 0.53956  | 1.69985  | 2.1487   |
| F                        | -2.24258 | -3.3187  | 1.05135  | O | 2.04007  | 0.89301  | 1.10618  |
| F                        | -1.22651 | -3.09515 | -0.85605 | O | 2.69234  | -1.15307 | 0.36251  |
| F                        | -3.11821 | -4.16843 | -0.74635 | C | 3.2179   | -3.39946 | -0.16104 |
| <b>IM2<sub>TFA</sub></b> |          |          |          | H | 2.20087  | -3.70200 | 0.10058  |
|                          |          |          |          | H | 3.59742  | -4.07422 | -0.92874 |
| C                        | 4.4565   | 0.00008  | -1.58209 | O | 4.08738  | -3.54030 | 0.97299  |
| C                        | 3.83025  | 0.81609  | -0.45032 | H | 3.68265  | -3.07440 | 1.71533  |
| C                        | 2.5049   | 0.20175  | -0.01478 | O | 5.59826  | -1.55429 | -0.20390 |
| C                        | 3.20016  | -1.97447 | -0.69612 | H | 5.41147  | -2.32097 | 0.36345  |
| C                        | 4.56579  | -1.47197 | -1.18687 | O | 5.72064  | 0.55095  | -1.94266 |
| H                        | 4.49997  | 0.82942  | 0.41508  | H | 6.35374  | 0.26480  | -1.26913 |
| H                        | 3.82424  | 0.08899  | -2.46924 | O | 3.55084  | 2.14899  | -0.88477 |
| H                        | 2.50943  | -1.94568 | -1.55078 | H | 4.35908  | 2.52511  | -1.25581 |
| H                        | 4.84438  | -2.05982 | -2.07032 | O | 1.26001  | 3.35115  | 0.16615  |
| H                        | 1.78995  | 0.24903  | -0.84662 | H | 2.12072  | 3.02880  | -0.16384 |
| C                        | 0.31528  | 2.28765  | 0.09624  | O | -1.09653 | 4.13440  | -0.57712 |
| C                        | -1.05269 | 2.97572  | 0.25802  | H | -0.17977 | 4.45311  | -0.61547 |
| C                        | -2.21378 | 2.1384   | -0.23824 | O | -3.36356 | 2.34013  | 0.12821  |
| C                        | -0.23144 | -0.02646 | 1.1322   | C | 0.05244  | -0.98316 | 2.28933  |
| C                        | 0.64537  | 1.23018  | 1.16971  | H | -0.56052 | -1.88291 | 2.15512  |
| H                        | -2.00336 | 1.45074  | -1.07019 |   |          |          |          |

|   |          |          |          |   |          |          |          |
|---|----------|----------|----------|---|----------|----------|----------|
| H | 1.10066  | -1.27418 | 2.2805   | C | 0.48701  | -2.61959 | -0.21278 |
| O | -0.21127 | -0.37870 | 3.55322  | C | 1.92735  | -3.16638 | -0.18776 |
| H | -1.11675 | -0.04397 | 3.52686  | C | 2.9621   | -2.11059 | -0.54121 |
| O | -1.58156 | 0.44516  | 1.22802  | C | 0.76512  | -0.59542 | 1.39729  |
| H | -4.41266 | 1.30193  | -0.32156 | C | 0.03175  | -1.89858 | 1.07086  |
| C | -4.73253 | -0.6148  | -0.37468 | H | 2.60434  | -1.29154 | -1.18654 |
| O | -5.11516 | 0.60939  | -0.59523 | H | 2.16739  | -3.60794 | 0.78464  |
| O | -3.68798 | -1.01283 | 0.09041  | H | 0.40354  | -1.94465 | -1.07409 |
| H | -2.21011 | -0.21714 | 0.88704  | H | 0.55248  | 0.1523   | 0.62751  |
| C | -5.83671 | -1.61791 | -0.80721 | H | 0.14803  | -2.59189 | 1.90504  |
| F | -5.4569  | -2.87872 | -0.58186 | O | -1.3876  | -1.67012 | 1.00994  |
| F | -6.97645 | -1.39445 | -0.1265  | O | -2.13158 | 0.46203  | 0.71038  |
| F | -6.10708 | -1.48924 | -2.12015 | O | 2.16461  | -0.90166 | 1.40302  |

## IM2<sub>TFA+w</sub>

|   |          |          |          |   |          |          |          |
|---|----------|----------|----------|---|----------|----------|----------|
| C | -3.74232 | -0.31354 | -1.53283 | C | -2.71968 | 2.75353  | 0.63177  |
| C | -3.12511 | -1.33023 | -0.57004 | H | -1.72921 | 3.02545  | 1.00503  |
| C | -1.85598 | -0.76618 | 0.05563  | H | -3.08894 | 3.56073  | -0.00141 |
| C | -2.61761 | 1.47176  | -0.18222 | O | -3.64812 | 2.63053  | 1.72027  |
| C | -3.93397 | 1.03828  | -0.84374 | H | -3.25954 | 2.03628  | 2.3743   |
| H | -3.83098 | -1.56055 | 0.23398  | O | -5.01351 | 0.87669  | 0.07712  |
| H | -3.07118 | -0.18966 | -2.38685 | H | -4.88853 | 1.51388  | 0.80015  |
| H | -1.88282 | 1.64302  | -0.98204 | O | -4.96486 | -0.8178  | -2.06429 |
| H | -4.19710 | 1.78963  | -1.59865 | H | -5.6373  | -0.70367 | -1.37794 |
| H | -1.11309 | -0.58919 | -0.73295 | O | -2.74994 | -2.52363 | -1.2621  |
|   |          |          |          | H | -3.51857 | -2.85095 | -1.74599 |

|                          |          |          |          |   |          |          |          |
|--------------------------|----------|----------|----------|---|----------|----------|----------|
| O                        | -0.34426 | -3.75744 | -0.43001 | C | 3.79667  | 0.82368  | -0.40662 |
| H                        | -1.22861 | -3.44923 | -0.70394 | C | 2.46428  | 0.20489  | -0.00081 |
| O                        | 2.07859  | -4.1368  | -1.22743 | C | 3.17109  | -1.96609 | -0.68347 |
| H                        | 1.19363  | -4.51891 | -1.34883 | C | 4.54508  | -1.45853 | -1.14541 |
| O                        | 4.14497  | -2.22559 | -0.28138 | H | 4.45077  | 0.82961  | 0.47068  |
| H                        | 5.06296  | -0.79357 | -0.70125 | H | 3.8252   | 0.11057  | -2.43054 |
| C                        | 0.36549  | -0.01978 | 2.75524  | H | 2.49641  | -1.93294 | -1.5506  |
| H                        | 0.86011  | 0.95103  | 2.87850  | H | 4.84006  | -2.04058 | -2.02739 |
| H                        | -0.71105 | 0.13218  | 2.79390  | H | 1.76464  | 0.26106  | -0.8449  |
| O                        | 0.70986  | -0.89977 | 3.82371  | C | 0.29876  | 2.31078  | 0.06999  |
| H                        | 1.64722  | -1.11132 | 3.72658  | C | -1.0866  | 2.95456  | 0.21255  |
| O                        | 5.44842  | 0.09401  | -0.89520 | C | -2.2007  | 2.01509  | -0.17485 |
| H                        | 4.42905  | 1.19242  | -1.13804 | C | -0.31856 | 0.02832  | 1.06699  |
| H                        | 6.08537  | -0.03051 | -1.60870 | C | 0.59627  | 1.25371  | 1.14743  |
| C                        | 2.96010  | 2.18281  | -0.33953 | H | -2.03832 | 1.36496  | -1.03748 |
| O                        | 3.74396  | 1.93525  | -1.34410 | H | -1.24691 | 3.29215  | 1.24219  |
| O                        | 2.97001  | 1.68478  | 0.76495  | H | 0.35982  | 1.86068  | -0.92928 |
| H                        | 2.65225  | -0.06657 | 1.29946  | H | -0.16659 | -0.51004 | 0.12596  |
| C                        | 1.88627  | 3.24167  | -0.71398 | H | 0.47105  | 1.71811  | 2.12629  |
| F                        | 1.17538  | 3.60508  | 0.35828  | O | 1.97893  | 0.88531  | 1.11983  |
| F                        | 2.44125  | 4.34451  | -1.24542 | O | 2.64093  | -1.15163 | 0.37055  |
| F                        | 1.03261  | 2.72736  | -1.62410 | C | 3.18100  | -3.39452 | -0.15747 |
| <b>TS2<sub>TFA</sub></b> |          |          |          | H | 2.16015  | -3.69913 | 0.08611  |
| C                        | 4.4423   | 0.01602  | -1.53338 | H | 3.57242  | -4.06349 | -0.92426 |



|   |          |          |          |                         |          |          |          |
|---|----------|----------|----------|-------------------------|----------|----------|----------|
| H | 0.48677  | 2.24615  | 2.01436  | O                       | -1.77487 | 1.13701  | 1.1036   |
| O | 1.89096  | 1.17916  | 1.07883  | H                       | -4.23954 | 2.39492  | -0.45345 |
| O | 2.32857  | -0.98239 | 0.54360  | O                       | -5.15573 | 1.74097  | -0.89832 |
| C | 2.6263   | -3.3111  | 0.25233  | H                       | -4.92042 | 0.74296  | -1.00296 |
| H | 1.58597  | -3.48221 | 0.53994  | H                       | -5.46947 | 2.07614  | -1.74802 |
| H | 2.93111  | -4.09411 | -0.44236 | C                       | -3.89612 | -1.34807 | -0.38327 |
| O | 3.48547  | -3.42393 | 1.39713  | O                       | -4.61258 | -0.71561 | -1.18725 |
| H | 3.13167  | -2.85274 | 2.09028  | O                       | -3.25507 | -0.95462 | 0.60677  |
| O | 5.17739  | -1.7255  | 0.03109  | H                       | -2.43951 | 0.41643  | 0.91665  |
| H | 4.91768  | -2.40707 | 0.6733   | C                       | -3.77477 | -2.88278 | -0.64415 |
| O | 5.49804  | 0.17006  | -1.91134 | F                       | -4.22782 | -3.5884  | 0.41759  |
| H | 6.10390  | -0.10863 | -1.21019 | F                       | -4.46049 | -3.30016 | -1.722   |
| O | 3.50084  | 2.07599  | -1.03014 | F                       | -2.48077 | -3.23293 | -0.83242 |
| H | 4.33954  | 2.33152  | -1.43485 |                         |          |          |          |
| O | 1.34315  | 3.61895  | -0.13290 | <b>PC<sub>TFA</sub></b> |          |          |          |
| H | 2.17149  | 3.19037  | -0.42300 | C                       | 4.59808  | -0.11503 | -1.25164 |
| O | -1.00331 | 4.46428  | -0.96139 | C                       | 3.89283  | 0.6478   | -0.12927 |
| H | -0.0752  | 4.72781  | -1.06852 | C                       | 2.46645  | 0.13992  | 0.04973  |
| O | -3.33754 | 3.01147  | 0.02426  | C                       | 3.04825  | -2.02249 | -0.76973 |
| C | -0.35176 | -0.30739 | 2.41884  | C                       | 4.51102  | -1.62209 | -1.01231 |
| H | -1.08051 | -1.12319 | 2.36641  | H                       | 4.42664  | 0.49797  | 0.81445  |
| H | 0.64777  | -0.73528 | 2.47416  | H                       | 4.11464  | 0.12883  | -2.20122 |
| O | -0.54386 | 0.47218  | 3.59657  | H                       | 2.49577  | -1.84213 | -1.70284 |
| H | -1.41903 | 0.87533  | 3.5419   | H                       | 4.85883  | -2.14797 | -1.91022 |
|   |          |          |          | H                       | 1.88683  | 0.34968  | -0.85803 |



|   |          |          |          |                           |          |          |          |
|---|----------|----------|----------|---------------------------|----------|----------|----------|
| C | 0.57109  | 2.47956  | 0.05645  | H                         | 2.39617  | 3.14317  | 0.16767  |
| C | -0.81231 | 3.1164   | 0.04699  | O                         | -0.88679 | 4.13696  | -0.93748 |
| C | -1.86723 | 2.06659  | -0.27688 | H                         | -0.07812 | 4.65934  | -0.85117 |
| C | -0.47815 | 0.29072  | 0.72977  | O                         | -3.12486 | 2.61256  | -0.13902 |
| C | 0.60236  | 1.32846  | 1.05934  | C                         | -0.58637 | -0.8057  | 1.78102  |
| H | -1.70744 | 1.64972  | -1.27892 | H                         | -1.37206 | -1.51124 | 1.49146  |
| H | -1.03365 | 3.52432  | 1.04173  | H                         | 0.3603   | -1.34285 | 1.8082   |
| H | 0.76918  | 2.10358  | -0.95553 | O                         | -0.81403 | -0.29641 | 3.09144  |
| H | -0.28731 | -0.17719 | -0.24326 | H                         | -1.66389 | 0.15937  | 3.09974  |
| H | 0.40631  | 1.72532  | 2.05562  | O                         | -1.7607  | 0.96801  | 0.68172  |
| O | 1.90763  | 0.75379  | 1.17328  | H                         | -3.76814 | 2.03332  | -0.58522 |
| O | 2.4647   | -1.25748 | 0.29279  | C                         | -4.63011 | -0.49233 | -0.43465 |
| C | 2.86003  | -3.48593 | -0.39472 | O                         | -4.75029 | 0.52144  | -1.08294 |
| H | 1.79272  | -3.70548 | -0.31194 | O                         | -3.70614 | -0.78809 | 0.43866  |
| H | 3.28916  | -4.12105 | -1.17001 | H                         | -3.00791 | -0.06266 | 0.52190  |
| O | 3.53423  | -3.82123 | 0.82791  | C                         | -5.63867 | -1.66238 | -0.58192 |
| H | 3.06659  | -3.38578 | 1.55154  | F                         | -6.62068 | -1.34302 | -1.42801 |
| O | 5.37846  | -1.91072 | 0.08482  | F                         | -5.01712 | -2.76039 | -1.05167 |
| H | 5.03678  | -2.69956 | 0.53827  | F                         | -6.18806 | -1.97243 | 0.60591  |
| O | 5.94738  | 0.32826  | -1.37412 |                           |          |          |          |
| H | 6.44526  | -0.0864  | -0.65545 |                           |          |          |          |
| O | 3.81079  | 2.04133  | -0.43861 |                           |          |          |          |
| H | 4.69549  | 2.34756  | -0.67560 |                           |          |          |          |
| O | 1.51048  | 3.49428  | 0.37398  |                           |          |          |          |
|   |          |          |          | <b>PC<sub>TFA+w</sub></b> |          |          |          |
|   |          |          |          | C                         | -5.15436 | 0.28349  | 0.34625  |
|   |          |          |          | C                         | -4.06712 | 0.55774  | -0.69363 |
|   |          |          |          | C                         | -2.70464 | 0.11526  | -0.17247 |
|   |          |          |          | C                         | -3.68631 | -1.54831 | 1.22167  |

|   |          |          |          |   |          |          |          |
|---|----------|----------|----------|---|----------|----------|----------|
| C | -5.11389 | -1.17823 | 0.79197  | O | -5.60551 | -1.95114 | -0.30378 |
| H | -4.27783 | -0.00543 | -1.60845 | H | -5.20488 | -2.83502 | -0.2512  |
| H | -4.98491 | 0.92987  | 1.21121  | O | -6.43248 | 0.64706  | -0.17017 |
| H | -3.44784 | -0.96059 | 2.11964  | H | -6.70412 | -0.06177 | -0.77021 |
| H | -5.77062 | -1.3056  | 1.66152  | O | -3.97581 | 1.95502  | -0.97856 |
| H | -2.43655 | 0.71192  | 0.70847  | H | -4.85984 | 2.273    | -1.20179 |
| C | -0.69807 | 2.34066  | -0.46881 | O | -1.37723 | 3.0727   | -1.47464 |
| C | 0.66034  | 2.97071  | -0.20326 | H | -2.29967 | 2.76125  | -1.47853 |
| C | 1.44774  | 2.11756  | 0.79173  | O | 0.46789  | 4.27301  | 0.33154  |
| C | 0.3217   | 0.07586  | 0.11086  | H | 1.342    | 4.63045  | 0.53271  |
| C | -0.51267 | 0.87597  | -0.89698 | O | 2.71036  | 2.65058  | 0.93143  |
| H | 0.9191   | 2.05611  | 1.75202  | H | 3.11183  | 2.31098  | 1.76509  |
| H | 1.23313  | 3.01566  | -1.13839 | C | 0.60206  | -1.35406 | -0.33432 |
| H | -1.2661  | 2.39008  | 0.46918  | H | 1.25771  | -1.83241 | 0.40025  |
| H | -0.17768 | 0.02789  | 1.08645  | H | -0.34773 | -1.88662 | -0.34105 |
| H | 0.01496  | 0.86387  | -1.85106 | O | 1.14217  | -1.45211 | -1.64970 |
| O | -1.76848 | 0.25758  | -1.19754 | H | 2.08373  | -1.24498 | -1.62162 |
| O | -2.73668 | -1.25706 | 0.18858  | O | 3.83802  | 1.44814  | 3.07376  |
| O | 1.57747  | 0.76879  | 0.28105  | H | 4.09895  | 0.60842  | 2.65800  |
| C | -3.50373 | -3.01927 | 1.56869  | H | 3.28204  | 1.21403  | 3.82553  |
| H | -2.48533 | -3.1834  | 1.92974  | C | 4.64776  | -0.75717 | 0.18019  |
| H | -4.20381 | -3.29981 | 2.35597  | O | 4.70608  | -0.66309 | 1.38091  |
| O | -3.78096 | -3.87714 | 0.45103  | O | 3.75186  | -0.26033 | -0.63535 |
| H | -3.07748 | -3.75295 | -0.1983  | H | 2.99902  | 0.22562  | -0.16648 |

|   |         |          |          |
|---|---------|----------|----------|
| C | 5.72245 | -1.54478 | -0.61741 |
| F | 5.15603 | -2.54436 | -1.31856 |
| F | 6.35412 | -0.73432 | -1.48647 |
| F | 6.63437 | -2.07237 | 0.20235  |
